# Supplementary material for: Effect of Fe–Fe interactions and X-site vacancy ordering on the OH-stretching spectrum of foitite
Source: Copernicus journal article supplement (doi:10.5194/ejm-35-105-2023), 2023-02-16
Supplement: Supplementary file 1 [file ejm-35-105-2023-supplement.zip]

Archive with 12 entries (12 files):
- model_5.cif
- model_6.cif
- model_10.cif
- model_7.cif
- ejm-35-105-2023-supplement-title-page.pdf
- model_8.cif
- model_1.cif
- model_9.cif
- model_4.cif
- model_3.cif
- model_2.cif
- Supplement_lattice_dynamic.pdf
