# Supplementary material for: Effect of Fe–Fe interactions and X-site vacancy ordering on the OH-stretching spectrum of foitite
Source: Copernicus journal article supplement (doi:10.5194/ejm-35-105-2023), 2023-02-16
Supplement: Supplementary file 1 [file ejm-35-105-2023-supplement.zip › ejm-35-105-2023-supplement-title-page.pdf]

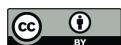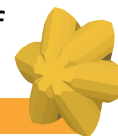

*Supplement of*

**Effect of Fe–Fe interactions and X-site vacancy ordering on the OH-stretching spectrum of foitite**

**Etienne Balan et al.**

*Correspondence to:* Etienne Balan ([etienne.balan@sorbonne-universite.fr](mailto:etienne.balan@sorbonne-universite.fr))  
and Guillaume Radtke ([guillaume.radtke@sorbonne-universite.fr](mailto:guillaume.radtke@sorbonne-universite.fr))

- [ejm-35-105-2023-supplement-title-page.pdf](#)
- [Supplement\\_lattice\\_dynamic.pdf](#)
- [model\\_1.cif](#)
- [model\\_10.cif](#)
- [model\\_2.cif](#)
- [model\\_3.cif](#)
- [model\\_4.cif](#)
- [model\\_5.cif](#)
- [model\\_6.cif](#)
- [model\\_7.cif](#)
- [model\\_8.cif](#)
- [model\\_9.cif](#)

The copyright of individual parts of the supplement might differ from the article licence.
