# Supplementary material for: Effect of Fe–Fe interactions and X-site vacancy ordering on the OH-stretching spectrum of foitite
Source: Copernicus journal article supplement (doi:10.5194/ejm-35-105-2023), 2023-02-16
Supplement: Supplementary file 1 [file ejm-35-105-2023-supplement.zip › model_1.cif]

#======================================================================

# CRYSTAL DATA

#----------------------------------------------------------------------

data_VESTA_phase_1


_pd_phase_name                         
_cell_length_a 16.1067867
_cell_length_b 16.1067867
_cell_length_c 14.55806160
_cell_angle_alpha                      90
_cell_angle_beta                       90
_cell_angle_gamma                      120
_symmetry_space_group_name_H-M         'P1'
_symmetry_Int_Tables_number            1

loop_
_symmetry_equiv_pos_as_xyz
   'x, y, z'

loop_
   _atom_site_label
   _atom_site_fract_x
   _atom_site_fract_y
   _atom_site_fract_z
Na       0.666030109   0.332032282   0.304542439
Na       0.666308310   0.332580351   0.804708617
Na       0.333048318   0.666061805   0.471377628
Na       0.334161989   0.668312069   0.970994569
Fea      0.111479861   0.061244907   0.325706786
Mg       0.124361043   0.062361126   0.821952125
Feb      0.949754023   0.061244718   0.325711350
Mg       0.937986883   0.062355445   0.821953646
Al       0.933505089   0.867016227   0.328782413
Mg       0.937969183   0.875944428   0.822079102
Mg       0.793278257   0.396167038   0.489422758
Mg       0.793262075   0.396500665   0.989457798
Mg       0.602872385   0.396170031   0.489403572
Mg       0.603219367   0.396499714   0.989431938
Mg       0.602965969   0.205946821   0.489000104
Mg       0.603116521   0.206248660   0.989928837
Mg       0.460848823   0.731106818   0.155823267
Mg       0.459987602   0.730286775   0.655956312
Mg       0.270237916   0.731110834   0.155790598
Mg       0.270287421   0.730285351   0.655946028
Mg       0.270589232   0.541204836   0.155872570
Mg       0.270083136   0.540178904   0.656307389
Al       0.297608778   0.260999633   0.315742864
Al       0.297769103   0.260925065   0.816119150
Al       0.743969212   0.039081751   0.315562326
Al       0.739294368   0.036857612   0.816124256
Al       0.964322327   0.699635824   0.316293640
Al       0.963160988   0.702416762   0.816003200
Al       0.735309334   0.699636846   0.316294000
Al       0.739245659   0.702416018   0.816010654
Al       0.963377387   0.260997302   0.315742137
Al       0.963156699   0.260927053   0.816119329
Al       0.295102206   0.039080136   0.315559556
Al       0.297552454   0.036852992   0.816120506
Al       0.965382674   0.594552379   0.483270598
Al       0.965084464   0.595622987   0.982554505
Al       0.403869991   0.369704320   0.483116592
Al       0.404595355   0.369622942   0.982802010
Al       0.630828049   0.034587791   0.482200172
Al       0.630395137   0.034594477   0.982983740
Al       0.403747830   0.034585190   0.482198009
Al       0.404187709   0.034591989   0.982977704
Al       0.629168058   0.594559475   0.483267214
Al       0.630521385   0.595627070   0.982562836
Al       0.965817890   0.369704629   0.483121707
Al       0.965009932   0.369623889   0.982804806
Al       0.635031670   0.929316946   0.149293749
Al       0.632117617   0.928653646   0.649621899
Al       0.071692153   0.703286903   0.148664377
Al       0.071818587   0.703420897   0.649975176
Al       0.298106406   0.369841135   0.148727080
Al       0.296443697   0.368152122   0.650093471
Al       0.071716981   0.369831769   0.148724671
Al       0.071697744   0.368153317   0.650092635
Al       0.294273345   0.929319169   0.149292711
Al       0.296522585   0.928648638   0.649618345
Al       0.631577998   0.703290308   0.148673073
Al       0.631588540   0.703416884   0.649977624
Si       0.192701801   0.190919866   0.008535971
Si       0.192052163   0.190560841   0.509455794
Si       0.810714982   0.002469254   0.008457182
Si       0.810340439   0.002459955   0.508476497
Si       0.997774958   0.807775615   0.008609596
Si       0.997207847   0.807057053   0.510168140
Si       0.809990166   0.807777648   0.008615884
Si       0.809842001   0.807058082   0.510173371
Si       0.998205840   0.190918240   0.008534362
Si       0.998493018   0.190560001   0.509458571
Si       0.191743414   0.002468182   0.008450862
Si       0.192108644   0.002460550   0.508470941
Si       0.858938975   0.523905859   0.174372174
Si       0.859233053   0.524036692   0.674362706
Si       0.476317842   0.334734137   0.174804186
Si       0.475861978   0.335213852   0.674405205
Si       0.664545351   0.139329520   0.175013114
Si       0.664834232   0.140581969   0.673946374
Si       0.474768187   0.139329485   0.175007981
Si       0.475733403   0.140580228   0.673941270
Si       0.664955141   0.523907547   0.174367087
Si       0.664796284   0.524038520   0.674362367
Si       0.858398488   0.334729732   0.174811314
Si       0.859336352   0.335211181   0.674412607
Si       0.527406557   0.858794481   0.340797515
Si       0.525933866   0.857574072   0.841003972
Si       0.143387699   0.669122365   0.341221760
Si       0.142618709   0.668493388   0.841197866
Si       0.331922296   0.474630990   0.340921182
Si       0.331612606   0.474182249   0.841330073
Si       0.142692745   0.474628545   0.340917914
Si       0.142556262   0.474184447   0.841331061
Si       0.331383166   0.858795733   0.340790664
Si       0.331628231   0.857571969   0.840998792
Si       0.525721617   0.669117331   0.341235001
Si       0.525858273   0.668490391   0.841203356
B        0.112840634   0.225693462   0.235412669
B        0.110670433   0.221348139   0.738888499
B        0.781294256   0.887326289   0.241519912
B        0.778846804   0.889453375   0.738706619
B        0.106013343   0.887324321   0.241510233
B        0.110595654   0.889453724   0.738704183
B        0.776525473   0.553049892   0.402357019
B        0.776739374   0.553488737   0.903219828
B        0.445608098   0.223145392   0.403381297
B        0.446412699   0.223096908   0.903446750
B        0.777530039   0.223145322   0.403392650
B        0.776679959   0.223099276   0.903460647
B        0.444039862   0.888088150   0.071013564
B        0.443584546   0.887176915   0.569485307
B        0.113351378   0.557191239   0.069834943
B        0.113235349   0.556513820   0.570142185
B        0.443825373   0.557197805   0.069847259
B        0.443270634   0.556518784   0.570140029
O       -0.012505323  -0.025004640   0.408249604
O        0.000031305   0.000066286   0.900787508
O        0.666692946   0.333421746   0.063560126
O        0.666444681   0.332927255   0.562523444
O        0.334147113   0.668347567   0.229780137
O        0.333510761   0.667038512   0.729513711
O        0.064538962   0.129093365   0.246383113
O        0.063557963   0.127124273   0.754147029
O        0.876575225   0.926673850   0.263287398
O        0.873088623   0.936524383   0.753857994
O        0.050086453   0.926678122   0.263282090
O        0.063428043   0.936527613   0.753856144
O        0.728462767   0.456929166   0.415099435
O        0.728516185   0.457036369   0.915593727
O        0.542135471   0.271069837   0.415276591
O        0.542899726   0.271210271   0.915792993
O        0.728925217   0.271067199   0.415294604
O        0.728303927   0.271211152   0.915812803
O        0.395766577   0.791534608   0.083153861
O        0.395322395   0.790642135   0.581209196
O        0.209791657   0.605707205   0.081872513
O        0.209646994   0.604936991   0.581854130
O        0.395900521   0.605713503   0.081893051
O        0.395282983   0.604942312   0.581864416
O        0.270464727   0.137502256   0.265473482
O        0.270520459   0.135271254   0.765589630
O        0.867028658   0.137496483   0.265473000
O        0.864746279   0.135274017   0.765592775
O        0.869835417   0.739688553   0.265534631
O        0.864751199   0.729513645   0.765702089
O        0.937388565   0.468849033   0.432659708
O        0.936987402   0.468656120   0.933201787
O        0.531453192   0.468859087   0.432654717
O        0.531651549   0.468658430   0.933198381
O        0.531374786   0.062761347   0.432015626
O        0.531399250   0.062811079   0.933435081
O        0.604634543   0.802077325   0.099726003
O        0.603352105   0.801529360   0.599731642
O        0.197427860   0.802076462   0.099718547
O        0.198166303   0.801525762   0.599726412
O        0.199212910   0.398442982   0.099518842
O        0.198455691   0.396921627   0.600036689
O        0.094522490   0.189056094   0.042176754
O        0.093421367   0.186856953   0.543545646
O        0.813433676   0.906598694   0.042916710
O        0.812833879   0.905923537   0.540707917
O        0.093161501   0.906589157   0.042906559
O        0.093075022   0.905927842   0.540705461
O        0.759951599   0.519917000   0.209901052
O        0.758247127   0.516501635   0.708767811
O        0.484271977   0.241359857   0.209599351
O        0.483745781   0.241829393   0.708474004
O        0.757073437   0.241355976   0.209613189
O        0.758070582   0.241828238   0.708483939
O        0.426759637   0.853526034   0.373073175
O        0.424766911   0.849546671   0.876145232
O        0.149194888   0.575066990   0.376436623
O        0.150332952   0.575267635   0.876425042
O        0.425862172   0.575059567   0.376455550
O        0.424922812   0.575258138   0.876435346
O        0.190687849   0.095863616   0.054243245
O        0.190695001   0.095561032   0.553758678
O        0.905159956   0.095871995   0.054246569
O        0.904853200   0.095560619   0.553766872
O        0.904185281   0.808379103   0.054942414
O        0.904328486   0.808662375   0.555786911
O        0.851463607   0.426021472   0.220204243
O        0.853425557   0.426764214   0.719803912
O        0.574543859   0.426025339   0.220195825
O        0.573326540   0.426763964   0.719797272
O        0.571055055   0.142128092   0.220571889
O        0.573202629   0.146420508   0.719105265
O        0.519100625   0.760224035   0.386617063
O        0.520515660   0.760347907   0.886424660
O        0.241121605   0.760219768   0.386605141
O        0.239818656   0.760348284   0.886414597
O        0.240795345   0.481606422   0.385853342
O        0.239741470   0.479496557   0.886682065
O        0.197521015   0.190490350   0.397943899
O        0.200208685   0.189845014   0.897995735
O        0.813316205   0.010374314   0.397470462
O        0.810730044   0.010228269   0.897894399
O        0.984231367   0.799226177   0.398044907
O        0.989601378   0.800134947   0.898084830
O        0.814991454   0.799227705   0.398051125
O        0.810521402   0.800134691   0.898090801
O        0.992957010   0.190494983   0.397946991
O        0.989631067   0.189841796   0.897994593
O        0.197048693   0.010366271   0.397465138
O        0.199489118   0.010230807   0.897888660
O        0.865397188   0.522916543   0.063982212
O        0.865198991   0.522780513   0.563554636
O        0.477475707   0.342701955   0.064259972
O        0.477185029   0.343056209   0.563757068
O        0.657494034   0.134228184   0.064416953
O        0.657583839   0.134308317   0.563249466
O        0.476714869   0.134226668   0.064412111
O        0.476707575   0.134303970   0.563243781
O        0.657504427   0.522914222   0.063977000
O        0.657570910   0.522781984   0.563553939
O        0.865205488   0.342695436   0.064266983
O        0.865849289   0.343045353   0.563764102
O        0.535771188   0.857027047   0.230458579
O        0.531353331   0.856409884   0.730301501
O        0.143712716   0.675958911   0.230662035
O        0.143912080   0.675140057   0.730506133
O        0.325686157   0.469751268   0.230259994
O        0.325023177   0.468925587   0.730638144
O        0.144047687   0.469750378   0.230256152
O        0.143893294   0.468928763   0.730638731
O        0.321247934   0.857025095   0.230450947
O        0.325043537   0.856401412   0.730296636
O        0.532219662   0.675944696   0.230673822
O        0.531213448   0.675137827   0.730511409
O        0.285587709   0.287546410   0.050050952
O        0.285016694   0.287090347   0.549839220
O        0.713673554  -0.002027518   0.049591915
O        0.713491303  -0.002134683   0.549344499
O        1.001839481   0.715167812   0.050273816
O        1.001905568   0.714607365   0.548718561
O        0.713314414   0.715171150   0.050280230
O        0.712695211   0.714608869   0.548724957
O        1.001951442   0.287547369   0.050045102
O        1.002060700   0.287089776   0.549844485
O        0.284290153  -0.002026466   0.049584591
O        0.284364114  -0.002130212   0.549342316
O        0.951203963   0.619234177   0.216757924
O        0.951258002   0.619518701   0.716164327
O        0.381591412   0.332720375   0.216997757
O        0.380662211   0.331911402   0.716609953
O        0.671096788   0.048500711   0.216550516
O        0.668325103   0.048789186   0.716298284
O        0.377388646   0.048500352   0.216547189
O        0.380454970   0.048785309   0.716297197
O        0.668020383   0.619235511   0.216756232
O        0.668245901   0.619516454   0.716167447
O        0.951111731   0.332709572   0.216996296
O        0.951237237   0.331913738   0.716614764
O        0.620162150   0.953251573   0.382887508
O        0.617661078   0.953142779   0.883141576
O        0.047721408   0.666177236   0.383496810
O        0.046870879   0.664637540   0.883064979
O        0.334810893   0.382366550   0.383084868
O        0.335779255   0.382533999   0.883183602
O        0.047537841   0.382369044   0.383082241
O        0.046742511   0.382537925   0.883185319
O        0.333082761   0.953250501   0.382883352
O        0.335470563   0.953139462   0.883138234
O        0.618451885   0.666176238   0.383497690
O        0.617754804   0.664640262   0.883070273
O        0.212388835   0.275113059   0.231142497
O        0.211480695   0.273259595   0.731946702
O        0.736381458   0.941470478   0.230332134
O        0.726871805   0.938211197   0.731794763
O        0.061018361   0.787896136   0.233429546
O        0.061491269   0.788580996   0.731426392
O        0.726855532   0.787896903   0.233448995
O        0.727077707   0.788581085   0.731426762
O        0.062715396   0.275116886   0.231144599
O        0.061774495   0.273264461   0.731950532
O        0.205071540   0.941463875   0.230333360
O        0.211327764   0.938209355   0.731791272
O        0.876881771   0.604251125   0.396457174
O        0.876903693   0.604324882   0.897424724
O        0.394732349   0.272517666   0.397977367
O        0.395886096   0.272702878   0.897576077
O        0.728891971   0.123071176   0.397347371
O        0.727448823   0.122978571   0.897671763
O        0.394172086   0.123070839   0.397337687
O        0.395519137   0.122976094   0.897662902
O        0.727372309   0.604253442   0.396459077
O        0.727408619   0.604321866   0.897428350
O        0.877776329   0.272515279   0.397984123
O        0.876810642   0.272701491   0.897583735
O        0.544208229   0.938590341   0.065414901
O        0.543796796   0.938055571   0.563897821
O        0.061993388   0.605990300   0.064573911
O        0.061993564   0.605549923   0.564545785
O        0.394949317   0.457130492   0.064291340
O        0.394251470   0.456467554   0.564601325
O        0.062159078   0.457122797   0.064291668
O        0.062201056   0.456462937   0.564602642
O        0.394371206   0.938587615   0.065409498
O        0.394238192   0.938043747   0.563894789
O        0.543981931   0.605993334   0.064579222
O        0.543548434   0.605560047   0.564540231
H       -0.011429987  -0.022882421   0.474757339
H        0.000291407   0.000589211   0.967014973
H        0.666044867   0.332247999   0.129399285
H        0.666068397   0.332281007   0.628388518
H        0.333539240   0.667340687   0.295633560
H        0.333501264   0.667099878   0.795364577
H        0.262230476   0.133358829   0.199017006
H        0.266230870   0.133107271   0.698861856
H        0.871116100   0.133355800   0.199016054
H        0.866871015   0.133120681   0.698863983
H        0.873109504   0.746223233   0.198605953
H        0.866941369   0.733900387   0.699000026
H        0.936380727   0.467918736   0.365894160
H        0.936303423   0.468156226   0.866429404
H        0.531539476   0.467948135   0.365889376
H        0.531817070   0.468164437   0.866426031
H        0.532026827   0.064071949   0.365214504
H        0.531766602   0.063540213   0.866669437
H        0.606380860   0.803053545   0.032968925
H        0.603655908   0.801940333   0.532991880
H        0.196643927   0.803058904   0.032961175
H        0.198278201   0.801933339   0.532986196
H        0.198633525   0.397291734   0.032744798
H        0.198019768   0.396047274   0.533305459
