# Supplementary material for: Effect of Fe–Fe interactions and X-site vacancy ordering on the OH-stretching spectrum of foitite
Source: Copernicus journal article supplement (doi:10.5194/ejm-35-105-2023), 2023-02-16
Supplement: Supplementary file 1 [file ejm-35-105-2023-supplement.zip › model_2.cif]

#======================================================================

# CRYSTAL DATA

#----------------------------------------------------------------------

data_VESTA_phase_1


_pd_phase_name                         
_cell_length_a 16.1067867
_cell_length_b 16.1067867
_cell_length_c 14.55806160
_cell_angle_alpha                      90
_cell_angle_beta                       90
_cell_angle_gamma                      120
_symmetry_space_group_name_H-M         'P1'
_symmetry_Int_Tables_number            1

loop_
_symmetry_equiv_pos_as_xyz
   'x, y, z'

loop_
   _atom_site_label
   _atom_site_fract_x
   _atom_site_fract_y
   _atom_site_fract_z
Na      -0.001501114  -0.003020619   0.135892967
Na       0.666064436   0.332120184   0.304880600
Na       0.666358653   0.332721930   0.804629548
Na       0.333064816   0.666137373   0.471736672
Na       0.333980746   0.667958311   0.971238012
Fea      0.113572855   0.062679135   0.330361026
Mg       0.125044961   0.062781488   0.818733500
Feb      0.949105701   0.062679097   0.330360302
Mg       0.937721803   0.062780861   0.818698788
Al       0.932915755   0.865832174   0.329925403
Mg       0.937677634   0.875371070   0.819110273
Mg       0.793190780   0.396180613   0.489624723
Mg       0.793102372   0.396420321   0.989544305
Mg       0.602988631   0.396179288   0.489622314
Mg       0.603312297   0.396419591   0.989539608
Mg       0.603026296   0.206054682   0.489199107
Mg       0.603211588   0.206429585   0.989927869
Mg       0.460733495   0.731008507   0.156129452
Mg       0.459842154   0.730271612   0.656276924
Mg       0.270273638   0.731009054   0.156126468
Mg       0.270424414   0.730273897   0.656275257
Mg       0.270411676   0.540824797   0.156262404
Mg       0.270283484   0.540569717   0.656701335
Al       0.298211237   0.261517528   0.316470230
Al       0.298327918   0.261555167   0.815714766
Al       0.743226073   0.038931133   0.316284909
Al       0.738814653   0.036830328   0.815739619
Al       0.964487493   0.699198842   0.316788012
Al       0.963242636   0.701964089   0.815636075
Al       0.734712551   0.699198368   0.316787040
Al       0.738711762   0.701959714   0.815634122
Al       0.963306682   0.261518992   0.316469419
Al       0.963223631   0.261556510   0.815713726
Al       0.295703324   0.038929350   0.316287185
Al       0.298006129   0.036831592   0.815742655
Al       0.965418325   0.594376487   0.483525497
Al       0.964963678   0.595082657   0.982206594
Al       0.404267453   0.370037828   0.483460137
Al       0.405051873   0.369936527   0.982522970
Al       0.630551659   0.034612934   0.482513624
Al       0.630152082   0.034839635   0.982559964
Al       0.404059061   0.034612232   0.482515731
Al       0.404679552   0.034839197   0.982561700
Al       0.628958039   0.594374997   0.483524249
Al       0.630113110   0.595080328   0.982205565
Al       0.965770846   0.370039593   0.483459577
Al       0.964880978   0.369938207   0.982521993
Al       0.634787843   0.929440680   0.149165937
Al       0.631619796   0.928441931   0.649710891
Al       0.071668036   0.703048604   0.148680623
Al       0.072096884   0.703264973   0.649993093
Al       0.297808160   0.369276318   0.148878841
Al       0.296866405   0.368923578   0.650235176
Al       0.071467199   0.369276301   0.148876735
Al       0.072055903   0.368922975   0.650234077
Al       0.294650634   0.929440353   0.149167172
Al       0.296817187   0.928444637   0.649715036
Al       0.631378060   0.703047035   0.148681606
Al       0.631159381   0.703259984   0.649990243
Si       0.192944611   0.191259554   0.007471548
Si       0.192264522   0.191021477   0.510443633
Si       0.810699577   0.002509564   0.007504199
Si       0.810086636   0.002334208   0.509089995
Si       0.997783012   0.807529086   0.007699396
Si       0.997472429   0.807103118   0.510321121
Si       0.809740061   0.807526433   0.007697196
Si       0.809627491   0.807102072   0.510320322
Si       0.998311913   0.191261362   0.007465567
Si       0.998755481   0.191021565   0.510442644
Si       0.191801644   0.002508107   0.007512098
Si       0.192244832   0.002334302   0.509092180
Si       0.859001204   0.523875372   0.174400807
Si       0.859162316   0.523965232   0.674457426
Si       0.476176332   0.334805733   0.174815350
Si       0.476100816   0.335342481   0.674554782
Si       0.664611868   0.139434792   0.174986902
Si       0.664788790   0.140704661   0.674087790
Si       0.474820230   0.139434077   0.174987876
Si       0.475910516   0.140703495   0.674089449
Si       0.664873408   0.523874964   0.174399429
Si       0.664800148   0.523962724   0.674456543
Si       0.858628206   0.334806284   0.174815531
Si       0.859240164   0.335344245   0.674554310
Si       0.527427362   0.858806982   0.340859136
Si       0.525859648   0.857555711   0.841247501
Si       0.143479044   0.669096058   0.341307646
Si       0.142727024   0.668535040   0.841431159
Si       0.331703509   0.474380116   0.341158037
Si       0.331700467   0.474381642   0.841625345
Si       0.142678504   0.474380152   0.341156876
Si       0.142677328   0.474381860   0.841624543
Si       0.331381313   0.858807113   0.340859072
Si       0.331690288   0.857556345   0.841249750
Si       0.525617849   0.669094573   0.341308860
Si       0.525801704   0.668533464   0.841429661
B        0.111795020   0.223591008   0.234562391
B        0.111080260   0.222161675   0.738323517
B        0.781548869   0.887552024   0.240744286
B        0.778314912   0.889202045   0.738121011
B        0.106002293   0.887551660   0.240745372
B        0.110879216   0.889208884   0.738128674
B        0.776625493   0.553249147   0.402686462
B        0.776780748   0.553565666   0.903323208
B        0.445646634   0.223141192   0.403746502
B        0.446399372   0.223138969   0.903472117
B        0.777495071   0.223142640   0.403746674
B        0.776734696   0.223139870   0.903472990
B        0.444109868   0.888222746   0.071023669
B        0.443505117   0.887013743   0.569524642
B        0.113162555   0.556917009   0.070065598
B        0.113457875   0.556732130   0.570216279
B        0.443751750   0.556916326   0.070066698
B        0.443271361   0.556731014   0.570215074
O       -0.012542335  -0.025084088   0.407885516
O        0.000114587   0.000266370   0.896228029
O        0.666680171   0.333369629   0.063736403
O        0.666466912   0.332935279   0.562673126
O        0.334058333   0.668119265   0.230099454
O        0.333615038   0.667239536   0.729980466
O        0.062603973   0.125208585   0.243881497
O        0.063871814   0.127742071   0.752541298
O        0.879019884   0.927963061   0.259366956
O        0.872741728   0.936363226   0.752321362
O        0.048942546   0.927963096   0.259367249
O        0.063615347   0.936370655   0.752340802
O        0.728591456   0.457181410   0.415210300
O        0.728588882   0.457180400   0.915751661
O        0.542115067   0.271042821   0.415372505
O        0.542814959   0.271184188   0.915875013
O        0.728928364   0.271044086   0.415374511
O        0.728365416   0.271185909   0.915878505
O        0.395883189   0.791767137   0.083529075
O        0.395283290   0.790570548   0.581335486
O        0.209520185   0.605365421   0.082472537
O        0.209787429   0.605094512   0.582019242
O        0.395843483   0.605365611   0.082474229
O        0.395304098   0.605093382   0.582019205
O        0.270093148   0.137196386   0.267019019
O        0.270767213   0.135419421   0.765268379
O        0.867102670   0.137198312   0.267017961
O        0.864644164   0.135419903   0.765261554
O        0.869716314   0.739432006   0.266385955
O        0.864671083   0.729350431   0.765510374
O        0.937464418   0.468929239   0.432673914
O        0.936901595   0.468610305   0.932975666
O        0.531464473   0.468927220   0.432672848
O        0.531703300   0.468608292   0.932975368
O        0.531334343   0.062670517   0.432044854
O        0.531482507   0.062972563   0.933150122
O        0.605177413   0.802364652   0.099532435
O        0.603215209   0.801514529   0.599863392
O        0.197185824   0.802365254   0.099531828
O        0.198295398   0.801518586   0.599866319
O        0.198493314   0.396988017   0.099515273
O        0.198714914   0.397430617   0.600211895
O        0.093206663   0.186419076   0.042341122
O        0.093409247   0.186820294   0.544245176
O        0.817965572   0.908799974   0.043403982
O        0.813095433   0.906085243   0.541030324
O        0.090832750   0.908794810   0.043415569
O        0.092986566   0.906086233   0.541033699
O        0.759671566   0.519344064   0.209929804
O        0.758442521   0.516886690   0.708970885
O        0.484267357   0.241475890   0.209581597
O        0.483525044   0.241739036   0.708665742
O        0.757208038   0.241475191   0.209581266
O        0.758211519   0.241739934   0.708663088
O        0.427124838   0.854247975   0.372909450
O        0.424934602   0.849874559   0.876708543
O        0.148656870   0.574654828   0.376113846
O        0.150123288   0.575233144   0.877017237
O        0.426001512   0.574652009   0.376117981
O        0.425105048   0.575232617   0.877019707
O        0.185526765   0.093443358   0.054361989
O        0.190879012   0.095685735   0.553673503
O        0.907914462   0.093440857   0.054352705
O        0.904804670   0.095685326   0.553671124
O        0.906301569   0.812609217   0.055250428
O        0.904377434   0.808757731   0.555103191
O        0.852771345   0.426597253   0.220319937
O        0.853165331   0.426714848   0.720108121
O        0.573825527   0.426596439   0.220318427
O        0.573548307   0.426711668   0.720107633
O        0.570969745   0.141941274   0.220514688
O        0.573314984   0.146633893   0.719463007
O        0.518434881   0.759918716   0.386591176
O        0.520603221   0.760436214   0.886828008
O        0.241487554   0.759917454   0.386590850
O        0.239829143   0.760435508   0.886830431
O        0.240836463   0.481671415   0.386272778
O        0.239792545   0.479589498   0.887101076
O        0.197215576   0.191033440   0.398536989
O        0.200061235   0.189487456   0.897381259
O        0.813288347   0.009620213   0.397666705
O        0.811165558   0.010326498   0.897368595
O        0.985280802   0.800426600   0.397688791
O        0.989574718   0.800453571   0.897608624
O        0.815145128   0.800425601   0.397688169
O        0.810868553   0.800450532   0.897606329
O        0.993817775   0.191034443   0.398535953
O        0.989419992   0.189485446   0.897375403
O        0.196329604   0.009618694   0.397668864
O        0.199152478   0.010324788   0.897376439
O        0.865535564   0.523125676   0.063995912
O        0.865251174   0.522770956   0.563665182
O        0.477337519   0.342711293   0.064278357
O        0.477384918   0.343220289   0.563912170
O        0.657582047   0.134120167   0.064384039
O        0.657449213   0.134309893   0.563407807
O        0.476532181   0.134120258   0.064384786
O        0.476856812   0.134310091   0.563409249
O        0.657586457   0.523124750   0.063994710
O        0.657517569   0.522768277   0.563664232
O        0.865371295   0.342712728   0.064278561
O        0.865835794   0.343222590   0.563911967
O        0.536222783   0.857166910   0.230509362
O        0.531154104   0.856402338   0.730562297
O        0.143643945   0.676382639   0.230740219
O        0.144010010   0.675073775   0.730759866
O        0.324665464   0.468517357   0.230520505
O        0.325315243   0.469343425   0.730942826
O        0.143852184   0.468516276   0.230519440
O        0.144025341   0.469342468   0.730942143
O        0.320944230   0.857167225   0.230509467
O        0.325241245   0.856403325   0.730564719
O        0.532736147   0.676379134   0.230741132
O        0.531054381   0.675068270   0.730758098
O        0.285274623   0.286663825   0.050101370
O        0.285278125   0.287392790   0.550208635
O        0.714576903  -0.001806078   0.049690741
O        0.713363639  -0.002129945   0.549467535
O        1.001812921   0.715779966   0.050403044
O        1.001991718   0.714654503   0.548571730
O        0.713961915   0.715779660   0.050402136
O        0.712660136   0.714652907   0.548571261
O        1.001385513   0.286663883   0.050098572
O        1.002113325   0.287393042   0.550207848
O        0.283612336  -0.001806159   0.049694286
O        0.284503442  -0.002130424   0.549468952
O        0.951122131   0.619743322   0.216594144
O        0.951363920   0.619442330   0.716139063
O        0.380813526   0.331910311   0.216879566
O        0.380968310   0.332304849   0.716689781
O        0.671595569   0.048664143   0.216440932
O        0.668121459   0.048753222   0.716332218
O        0.377067208   0.048663516   0.216443246
O        0.380626071   0.048753157   0.716335045
O        0.668621510   0.619743391   0.216593017
O        0.668071680   0.619438116   0.716137363
O        0.951096454   0.331911035   0.216878252
O        0.951333945   0.332304216   0.716688975
O        0.620522030   0.953186428   0.382874269
O        0.617864722   0.953140931   0.883343273
O        0.047888706   0.666468526   0.383518398
O        0.046934395   0.664864712   0.883276139
O        0.334533921   0.381982490   0.383158152
O        0.335584366   0.382450987   0.883444324
O        0.047449666   0.381983996   0.383157715
O        0.046862363   0.382451135   0.883443093
O        0.332663739   0.953184907   0.382875871
O        0.335268469   0.953140325   0.883345620
O        0.618581372   0.666467216   0.383517474
O        0.617923244   0.664861438   0.883274681
O        0.210987715   0.272583271   0.230796203
O        0.211860553   0.273918822   0.731996206
O        0.737373284   0.941922790   0.230035357
O        0.726484906   0.938074511   0.731800021
O        0.060644930   0.788504755   0.233464045
O        0.061662248   0.788375237   0.731422938
O        0.727858778   0.788504872   0.233463366
O        0.726697687   0.788368460   0.731422345
O        0.061594786   0.272583441   0.230795063
O        0.062054810   0.273916738   0.731994290
O        0.204548671   0.941921712   0.230038664
O        0.211581543   0.938079735   0.731801914
O        0.877053434   0.604622553   0.396838889
O        0.877012876   0.604568916   0.897606040
O        0.394660707   0.272453023   0.398400442
O        0.395748192   0.272667129   0.897676590
O        0.728943935   0.122986358   0.397795561
O        0.727641871   0.122942920   0.897802261
O        0.394040824   0.122984832   0.397796652
O        0.395293443   0.122942226   0.897803636
O        0.727571176   0.604622607   0.396838834
O        0.727549467   0.604566654   0.897604989
O        0.877792915   0.272454811   0.398400087
O        0.876914138   0.272666992   0.897676347
O        0.544437609   0.938789663   0.065318119
O        0.543728449   0.937943420   0.563866620
O        0.061830854   0.605905815   0.064595673
O        0.062161136   0.605718983   0.564532800
O        0.394765781   0.456735478   0.064480172
O        0.394327545   0.456676682   0.564590304
O        0.061967426   0.456735956   0.064479072
O        0.062348610   0.456677657   0.564590068
O        0.394348167   0.938788837   0.065318296
O        0.394212630   0.937944412   0.563870057
O        0.544071961   0.605904794   0.064595945
O        0.543554998   0.605717268   0.564529954
H       -0.012192408  -0.024382667   0.474502514
H        0.000907190   0.002069091   0.961984042
H        0.665866964   0.331775375   0.129571411
H        0.666045994   0.332103432   0.628539541
H        0.333789399   0.667593830   0.295969370
H        0.333678499   0.667384743   0.795829035
H        0.264381137   0.134478252   0.200419793
H        0.268117748   0.134013956   0.698467689
H        0.870095570   0.134483035   0.200418621
H        0.865877798   0.134026777   0.698460164
H        0.871860685   0.743718834   0.199421153
H        0.866052275   0.732111712   0.698737957
H        0.936330627   0.467912334   0.365902339
H        0.935909484   0.467927115   0.866180185
H        0.531579787   0.467909469   0.365901252
H        0.532010370   0.467925931   0.866179899
H        0.532053644   0.064111258   0.365243721
H        0.532023014   0.064054524   0.866359779
H        0.604829820   0.802254582   0.032713013
H        0.602921667   0.801632835   0.533120981
H        0.197422594   0.802259125   0.032712360
H        0.198705569   0.801641645   0.533124063
H        0.198806787   0.397612249   0.032699882
H        0.198633752   0.397266404   0.533465984
