# Supplementary material for: Effect of Fe–Fe interactions and X-site vacancy ordering on the OH-stretching spectrum of foitite
Source: Copernicus journal article supplement (doi:10.5194/ejm-35-105-2023), 2023-02-16
Supplement: Supplementary file 1 [file ejm-35-105-2023-supplement.zip › model_3.cif]

#======================================================================

# CRYSTAL DATA

#----------------------------------------------------------------------

data_VESTA_phase_1


_pd_phase_name                         
_cell_length_a 16.1067867
_cell_length_b 16.1067867
_cell_length_c 14.55806160
_cell_angle_alpha                      90
_cell_angle_beta                       90
_cell_angle_gamma                      120
_symmetry_space_group_name_H-M         'P1'
_symmetry_Int_Tables_number            1

loop_
_symmetry_equiv_pos_as_xyz
   'x, y, z'

loop_
   _atom_site_label
   _atom_site_fract_x
   _atom_site_fract_y
   _atom_site_fract_z
Na       0.666471652   0.332943222   0.304696805
Na       0.666374511   0.332755214   0.804723270
Na       0.333030310   0.666066244   0.471500964
Na       0.333601107   0.667208533   0.970915789
Fea      0.122125821   0.061760618   0.324076291
Mg       0.124319377   0.062393204   0.821995475
Feb      0.939620944   0.061761221   0.324079138
Mg       0.938062575   0.062392975   0.821996295
Al       0.934559447   0.869131004   0.326652447
Mg       0.937966151   0.875943867   0.822107135
Mg       0.793405043   0.396754752   0.489731991
Mg       0.793220442   0.396358857   0.989363487
Mg       0.603334530   0.396755007   0.489726240
Mg       0.603121634   0.396359064   0.989358396
Mg       0.603306842   0.206629601   0.489887882
Mg       0.603073285   0.206161891   0.989441419
Mg       0.460351481   0.730439862   0.155647304
Mg       0.460078396   0.730382903   0.656043492
Mg       0.270074238   0.730439971   0.155642353
Mg       0.270290563   0.730382653   0.656040158
Mg       0.270216897   0.540449792   0.156037789
Mg       0.270159399   0.540332564   0.656412353
Al       0.299310098   0.261797070   0.316151295
Al       0.297629681   0.260941134   0.816274507
Al       0.740561524   0.038365159   0.315471857
Al       0.739410113   0.036909560   0.816161646
Al       0.964389765   0.700094004   0.315962336
Al       0.963193940   0.702476097   0.816016156
Al       0.735692385   0.700095619   0.315962897
Al       0.739270172   0.702475787   0.816016244
Al       0.962473014   0.261798935   0.316152490
Al       0.963300004   0.260940952   0.816275263
Al       0.297789525   0.038363851   0.315470994
Al       0.297487751   0.036909198   0.816161197
Al       0.965481445   0.595102686   0.483226355
Al       0.964971457   0.595347263   0.982468766
Al       0.404393292   0.370029476   0.483537220
Al       0.404290331   0.369395743   0.982942305
Al       0.630474644   0.034951314   0.482780104
Al       0.630298809   0.034465703   0.982779489
Al       0.404463581   0.034950687   0.482779011
Al       0.404154499   0.034465546   0.982779277
Al       0.629608702   0.595102563   0.483225668
Al       0.630361540   0.595347885   0.982468290
Al       0.965623230   0.370029501   0.483539261
Al       0.965091271   0.369395583   0.982942702
Al       0.634145617   0.928586652   0.148793125
Al       0.632092210   0.928775481   0.649822368
Al       0.071602415   0.702511641   0.148519109
Al       0.071907055   0.703820398   0.649840454
Al       0.297072629   0.368652007   0.149098826
Al       0.296587478   0.368348669   0.650245249
Al       0.071563542   0.368653065   0.149099523
Al       0.071748729   0.368348399   0.650245931
Al       0.294429981   0.928586463   0.148792383
Al       0.296671741   0.928775290   0.649821848
Al       0.630897595   0.702514834   0.148520130
Al       0.631901585   0.703821034   0.649840466
Si       0.192331422   0.190347344   0.008749638
Si       0.192773353   0.191056565   0.508956755
Si       0.810402650   0.002113220   0.008471600
Si       0.810097589   0.002912057   0.508728558
Si       0.997671500   0.807439384   0.008654070
Si       0.997407127   0.807700684   0.509407139
Si       0.809756030   0.807439581   0.008654057
Si       0.810282386   0.807700640   0.509408325
Si       0.998003957   0.190347938   0.008750374
Si       0.998271667   0.191056643   0.508957009
Si       0.191698418   0.002112406   0.008471112
Si       0.192802720   0.002911903   0.508727489
Si       0.858756745   0.523604241   0.174348778
Si       0.859352033   0.524385345   0.674479239
Si       0.476178728   0.334635412   0.174635514
Si       0.476045828   0.335480420   0.674770604
Si       0.664391669   0.139557348   0.174621678
Si       0.664940010   0.140882316   0.674558578
Si       0.475153529   0.139560392   0.174621641
Si       0.475929226   0.140882454   0.674557653
Si       0.664825042   0.523606579   0.174348923
Si       0.665020442   0.524385240   0.674478280
Si       0.858437833   0.334633704   0.174635935
Si       0.859422045   0.335480320   0.674772706
Si       0.526931408   0.858286019   0.340578357
Si       0.525925817   0.857549549   0.841078994
Si       0.143212576   0.668887249   0.341010095
Si       0.142583941   0.668531914   0.841175518
Si       0.331759591   0.474438026   0.341223197
Si       0.331620305   0.474245806   0.841473580
Si       0.142664795   0.474438246   0.341223570
Si       0.142612645   0.474245495   0.841473977
Si       0.331343479   0.858286093   0.340576508
Si       0.331612070   0.857548949   0.841078633
Si       0.525662273   0.668887961   0.341011582
Si       0.525936077   0.668532652   0.841175448
B        0.112004392   0.224025314   0.239694668
B        0.110727759   0.221467007   0.738989637
B        0.779734721   0.886452374   0.240498855
B        0.778977682   0.889627123   0.738704831
B        0.106704271   0.886449691   0.240497297
B        0.110637943   0.889627115   0.738704424
B        0.776808802   0.553629698   0.402431497
B        0.776689956   0.553392566   0.903169613
B        0.446810560   0.223660621   0.403536112
B        0.446283321   0.223069715   0.903436204
B        0.776837812   0.223660978   0.403540089
B        0.776774374   0.223069959   0.903438593
B        0.443745971   0.887502656   0.070521241
B        0.443599788   0.887210777   0.569754530
B        0.113131644   0.556513599   0.069941195
B        0.113245716   0.556849543   0.570293014
B        0.443368837   0.556514304   0.069943185
B        0.443592232   0.556849987   0.570294046
O       -0.010637070  -0.021263618   0.401921406
O        0.000014415   0.000038769   0.900816603
O        0.666513600   0.333051699   0.063414880
O        0.666875731   0.333773923   0.563320286
O        0.333847808   0.667716792   0.229771509
O        0.333620353   0.667260009   0.729637040
O        0.064006504   0.128029656   0.257443661
O        0.063595469   0.127202793   0.754040005
O        0.874757597   0.925865567   0.261352927
O        0.873197618   0.936662820   0.753876715
O        0.051094275   0.925863107   0.261350133
O        0.063453782   0.936662666   0.753876856
O        0.728758976   0.457528432   0.415335581
O        0.728462259   0.456936508   0.915599635
O        0.543233035   0.271559327   0.415697990
O        0.542791628   0.271200326   0.915645895
O        0.728314378   0.271559766   0.415703469
O        0.728397076   0.271200877   0.915650347
O        0.395476007   0.790961616   0.082708116
O        0.395342253   0.790695370   0.581321063
O        0.209577196   0.605002694   0.081948489
O        0.209680159   0.605123733   0.581986879
O        0.395412580   0.605003425   0.081952937
O        0.395432559   0.605124555   0.581990103
O        0.273084593   0.137358818   0.265465676
O        0.270472823   0.135378998   0.765691909
O        0.864259212   0.137363443   0.265467743
O        0.864895628   0.135377619   0.765692660
O        0.870138818   0.740293179   0.264735103
O        0.864802693   0.729617743   0.765688822
O        0.937310348   0.469297045   0.433042452
O        0.937010554   0.468478920   0.933186450
O        0.531973716   0.469295541   0.433039726
O        0.531454610   0.468477533   0.933183900
O        0.531448696   0.062911205   0.432744372
O        0.531350535   0.062714238   0.933132743
O        0.603938138   0.801421196   0.099391934
O        0.603483686   0.801850167   0.599736070
O        0.197472341   0.801419001   0.099390768
O        0.198354638   0.801848374   0.599735036
O        0.198548919   0.397115302   0.099904385
O        0.198579639   0.397173423   0.600169162
O        0.093926914   0.187865877   0.042859841
O        0.093548864   0.187109243   0.541439468
O        0.813001490   0.906185241   0.042856477
O        0.813052842   0.906530892   0.539952991
O        0.093172939   0.906183485   0.042857210
O        0.093466917   0.906530504   0.539952272
O        0.759561032   0.519146124   0.209964247
O        0.758367931   0.516748892   0.709065980
O        0.483772548   0.241095252   0.209371938
O        0.483824419   0.242073577   0.709048271
O        0.757310967   0.241087055   0.209373273
O        0.758237728   0.242071818   0.709049993
O        0.425891490   0.851794734   0.373278038
O        0.424794622   0.849600619   0.876184863
O        0.150143962   0.575428418   0.376352486
O        0.150273516   0.575300647   0.876462245
O        0.425272432   0.575427004   0.376351747
O        0.425015779   0.575300279   0.876461612
O        0.190665761   0.095458245   0.054328724
O        0.191384751   0.096031355   0.553541132
O        0.904780834   0.095459020   0.054329219
O        0.904636380   0.096030558   0.553541540
O        0.904018496   0.808048793   0.054915911
O        0.904762056   0.809534718   0.555200190
O        0.851465672   0.425754470   0.220165517
O        0.853528881   0.427113079   0.719981759
O        0.574257867   0.425767667   0.220169714
O        0.573572225   0.427111987   0.719979520
O        0.571733577   0.143480454   0.220399346
O        0.573326703   0.146666826   0.719912187
O        0.520135137   0.760555631   0.386449259
O        0.520553205   0.760352477   0.886489623
O        0.240408870   0.760554727   0.386444891
O        0.239788563   0.760350633   0.886488455
O        0.240053073   0.480119829   0.386554637
O        0.239881572   0.479775622   0.886879773
O        0.201450018   0.192301467   0.398148505
O        0.199919658   0.189732629   0.898172648
O        0.810685477   0.010082680   0.397423785
O        0.810682810   0.010123259   0.897909634
O        0.984556044   0.800098099   0.397340581
O        0.989548379   0.800056072   0.898110698
O        0.815530943   0.800097668   0.397342022
O        0.810495547   0.800055658   0.898110715
O        0.990838131   0.192301892   0.398148936
O        0.989801554   0.189732952   0.898173320
O        0.199383097   0.010082161   0.397422724
O        0.199428109   0.010122800   0.897909141
O        0.865218465   0.522584893   0.063942767
O        0.865342793   0.523432110   0.563687498
O        0.477279895   0.342450240   0.064143350
O        0.477579992   0.343269541   0.564103143
O        0.657257278   0.134109003   0.064105797
O        0.657587090   0.134712353   0.563863830
O        0.476835357   0.134110695   0.064105528
O        0.477108006   0.134713324   0.563862614
O        0.657343864   0.522582402   0.063943008
O        0.658073805   0.523431183   0.563686867
O        0.865155004   0.342451306   0.064143908
O        0.865675511   0.343269733   0.564105099
O        0.534915068   0.856487857   0.230223791
O        0.531375465   0.856459245   0.730383272
O        0.143554216   0.674850616   0.230387708
O        0.143958221   0.675384906   0.730504427
O        0.324753913   0.468672065   0.230603415
O        0.325033276   0.469039784   0.730796319
O        0.143901275   0.468673585   0.230603501
O        0.143992300   0.469039980   0.730796586
O        0.321564413   0.856489026   0.230221731
O        0.325070585   0.856458408   0.730383147
O        0.531283694   0.674853890   0.230389247
O        0.531414213   0.675386478   0.730504358
O        0.285166520   0.286998077   0.050251649
O        0.285359089   0.287472769   0.550410706
O        0.713403721  -0.002212198   0.049569273
O        0.713228579  -0.001836453   0.549537879
O        1.001766249   0.714783479   0.050188236
O        1.002166915   0.715307090   0.548362905
O        0.713005066   0.714784113   0.050188390
O        0.713129125   0.715306570   0.548363717
O        1.001817782   0.286997853   0.050252564
O        1.002101956   0.287472605   0.550411436
O        0.284371803  -0.002213293   0.049568693
O        0.284922662  -0.001837888   0.549536324
O        0.950904635   0.618901788   0.216712601
O        0.951433696   0.619874232   0.716133782
O        0.381334570   0.332487802   0.216814372
O        0.380841238   0.332166775   0.716951497
O        0.669442216   0.047969298   0.216226913
O        0.668347610   0.048926049   0.716553998
O        0.378514369   0.047971918   0.216226253
O        0.380566500   0.048925492   0.716553616
O        0.667984076   0.618908225   0.216711511
O        0.668428294   0.619874029   0.716133916
O        0.951138716   0.332494531   0.216816599
O        0.951313225   0.332166044   0.716952312
O        0.618986552   0.953545749   0.382692173
O        0.617712000   0.953117381   0.883093110
O        0.047579838   0.665922658   0.383245042
O        0.046821145   0.664593311   0.883062608
O        0.336055569   0.382942640   0.383206941
O        0.335551958   0.382484412   0.883399554
O        0.046873943   0.382942825   0.383207936
O        0.046919984   0.382483946   0.883400336
O        0.334546552   0.953544774   0.382691196
O        0.335393719   0.953116753   0.883092905
O        0.618330896   0.665923375   0.383245780
O        0.617760122   0.664593541   0.883062023
O        0.211415405   0.273026248   0.231733240
O        0.211533638   0.273394268   0.732111073
O        0.734413370   0.940579438   0.230307062
O        0.727034652   0.938430923   0.731710566
O        0.061801738   0.786947174   0.233205211
O        0.061596399   0.788800226   0.731442147
O        0.725134549   0.786950403   0.233207522
O        0.727192175   0.788800133   0.731442341
O        0.061594685   0.273027057   0.231733535
O        0.061849810   0.273394892   0.732111792
O        0.206153347   0.940575535   0.230307563
O        0.211384656   0.938431319   0.731709578
O        0.877096659   0.604823893   0.396416118
O        0.876851770   0.604209717   0.897362202
O        0.396443327   0.273403053   0.397917954
O        0.395670259   0.272596239   0.897710166
O        0.727977063   0.123458440   0.397520433
O        0.727505865   0.122955587   0.897675367
O        0.395468627   0.123457870   0.397517602
O        0.395437444   0.122955217   0.897674169
O        0.727713985   0.604822660   0.396415081
O        0.727344766   0.604209100   0.897362992
O        0.876947327   0.273403728   0.397921281
O        0.876913923   0.272596024   0.897711279
O        0.543901801   0.938123296   0.064952265
O        0.543776379   0.938182638   0.564197300
O        0.061810068   0.605374832   0.064449619
O        0.062158146   0.606052265   0.564528343
O        0.394437402   0.456478462   0.064614180
O        0.394703500   0.456822419   0.564892201
O        0.062026953   0.456477942   0.064613296
O        0.062106316   0.456821914   0.564892740
O        0.394210517   0.938123253   0.064951919
O        0.394395058   0.938182697   0.564197430
O        0.543551482   0.605376732   0.064449535
O        0.543882444   0.606052678   0.564528299
H       -0.009092198  -0.018175376   0.468296080
H        0.000223015   0.000456608   0.967043489
H        0.665800697   0.331643277   0.129254324
H        0.666844132   0.333729830   0.629179737
H        0.333692715   0.667428197   0.295629338
H        0.333709175   0.667452534   0.795485237
H        0.264946164   0.132922007   0.199004101
H        0.266204153   0.133316443   0.698959218
H        0.867962035   0.132925302   0.199006495
H        0.867101659   0.133315607   0.698959935
H        0.873183622   0.746382573   0.197758595
H        0.867003771   0.734019787   0.698990763
H        0.936371220   0.468229378   0.366285833
H        0.936360592   0.467949080   0.866412734
H        0.531845534   0.468228112   0.366282885
H        0.531572639   0.467948477   0.866410206
H        0.532185738   0.064385133   0.365962173
H        0.531719541   0.063452735   0.866362826
H        0.605348669   0.802130726   0.032620507
H        0.603755133   0.802189195   0.532992940
H        0.196770693   0.802129777   0.032619371
H        0.198421047   0.802188338   0.532991946
H        0.197918885   0.395856068   0.033134416
H        0.198087490   0.396189602   0.533430725
