# Supplementary material for: Effect of Fe–Fe interactions and X-site vacancy ordering on the OH-stretching spectrum of foitite
Source: Copernicus journal article supplement (doi:10.5194/ejm-35-105-2023), 2023-02-16
Supplement: Supplementary file 1 [file ejm-35-105-2023-supplement.zip › model_4.cif]

#======================================================================

# CRYSTAL DATA

#----------------------------------------------------------------------

data_VESTA_phase_1


_pd_phase_name                         
_cell_length_a 16.1067867
_cell_length_b 16.1067867
_cell_length_c 14.55806160
_cell_angle_alpha                      90
_cell_angle_beta                       90
_cell_angle_gamma                      120
_symmetry_space_group_name_H-M         'P1'
_symmetry_Int_Tables_number            1

loop_
_symmetry_equiv_pos_as_xyz
   'x, y, z'

loop_
   _atom_site_label
   _atom_site_fract_x
   _atom_site_fract_y
   _atom_site_fract_z
Na       0.001153709   0.002347762   0.138670470
Na       0.666471338   0.332928296   0.304980675
Na       0.666360557   0.332669331   0.804610287
Na       0.333047236   0.666058881   0.471823099
Na       0.333519205   0.667053540   0.971143958
Fea      0.124373834   0.062768954   0.328778597
Mg       0.124875640   0.062621369   0.819093702
Feb      0.938389919   0.062770905   0.328782039
Mg       0.937745813   0.062613300   0.819063275
Al       0.933922051   0.867855709   0.328054076
Mg       0.937638250   0.875270705   0.819050624
Mg       0.793400591   0.396847423   0.489766459
Mg       0.793081724   0.396259709   0.989422665
Mg       0.603446968   0.396853815   0.489766243
Mg       0.603179719   0.396261397   0.989405779
Mg       0.603420610   0.206843263   0.490135176
Mg       0.603173520   0.206338564   0.989486327
Mg       0.460279300   0.730349377   0.155998107
Mg       0.459863558   0.730243841   0.656366638
Mg       0.270062735   0.730353275   0.155983709
Mg       0.270384378   0.730241178   0.656355160
Mg       0.270111584   0.540229703   0.156322918
Mg       0.270280366   0.540555660   0.656715704
Al       0.299777922   0.262502190   0.316861072
Al       0.298076193   0.261416013   0.815938748
Al       0.739653061   0.038270005   0.316169422
Al       0.738890636   0.036824261   0.815824103
Al       0.964619468   0.699795486   0.316420127
Al       0.963259543   0.701987729   0.815634615
Al       0.735170664   0.699797038   0.316428036
Al       0.738730154   0.701986669   0.815643125
Al       0.962719839   0.262501522   0.316856907
Al       0.963355429   0.261417660   0.815935046
Al       0.298615661   0.038275556   0.316165677
Al       0.297942107   0.036824415   0.815824330
Al       0.965532159   0.594952580   0.483425071
Al       0.964835871   0.594815695   0.982102566
Al       0.404728663   0.370344148   0.483876601
Al       0.404683547   0.369666610   0.982638072
Al       0.630147746   0.034988303   0.483199983
Al       0.629990675   0.034640794   0.982389669
Al       0.404839300   0.034990345   0.483197554
Al       0.404656745   0.034641646   0.982386901
Al       0.629424368   0.594957554   0.483433597
Al       0.629977787   0.594818113   0.982108668
Al       0.965612251   0.370341793   0.483873719
Al       0.964981076   0.369663196   0.982633060
Al       0.633940761   0.928704943   0.148678365
Al       0.631500973   0.928494958   0.649988426
Al       0.071551978   0.702388875   0.148477121
Al       0.072185315   0.703617956   0.649841332
Al       0.296890854   0.368326394   0.149205735
Al       0.296901008   0.368924330   0.650385516
Al       0.071430288   0.368324546   0.149201016
Al       0.072029656   0.368925252   0.650380319
Al       0.294757546   0.928704493   0.148672942
Al       0.296993405   0.928492671   0.649982766
Al       0.630823307   0.702383655   0.148490970
Al       0.631427358   0.703609280   0.649853186
Si       0.192443839   0.190402221   0.007877705
Si       0.192796530   0.191385136   0.509744451
Si       0.810199905   0.002003537   0.007591103
Si       0.809637448   0.002606618   0.509409187
Si       0.997630527   0.807178632   0.007728843
Si       0.997694947   0.807791451   0.509642307
Si       0.809552245   0.807177704   0.007735721
Si       0.810095999   0.807791269   0.509651070
Si       0.997967966   0.190405255   0.007869891
Si       0.998584210   0.191384313   0.509743928
Si       0.191805049   0.002000944   0.007590660
Si       0.192968644   0.002610070   0.509405085
Si       0.858832316   0.523579684   0.174342560
Si       0.859293944   0.524285948   0.674471977
Si       0.476009050   0.334728955   0.174636847
Si       0.476215558   0.335552754   0.674864179
Si       0.664461873   0.139703932   0.174594765
Si       0.664898946   0.141020919   0.674759418
Si       0.475235900   0.139706890   0.174589004
Si       0.476124539   0.141016540   0.674761315
Si       0.664743600   0.523583881   0.174343312
Si       0.664997159   0.524283256   0.674478541
Si       0.858708087   0.334719600   0.174634864
Si       0.859344625   0.335555578   0.674861348
Si       0.526940305   0.858295870   0.340689230
Si       0.525790397   0.857420059   0.841356812
Si       0.143311476   0.669013346   0.341102050
Si       0.142633334   0.668457016   0.841366654
Si       0.331610580   0.474351579   0.341403199
Si       0.331652914   0.474334394   0.841738676
Si       0.142732933   0.474356252   0.341393599
Si       0.142689057   0.474336944   0.841733883
Si       0.331352621   0.858301696   0.340685474
Si       0.331633126   0.857421794   0.841349353
Si       0.525686454   0.668998509   0.341111323
Si       0.525821745   0.668454154   0.841379125
B        0.111182175   0.222369269   0.238768964
B        0.111035084   0.222059081   0.738517462
B        0.780350240   0.886924332   0.239477397
B        0.778387988   0.889325538   0.738145436
B        0.106557501   0.886927317   0.239463856
B        0.110942831   0.889335621   0.738146197
B        0.776981084   0.553962171   0.402698171
B        0.776697919   0.553392057   0.903200821
B        0.446724039   0.223654867   0.403952608
B        0.446225070   0.223032825   0.903495421
B        0.776928942   0.223645618   0.403958409
B        0.776821744   0.223029911   0.903502339
B        0.443807507   0.887611675   0.070627315
B        0.443486467   0.886973538   0.569841601
B        0.112937844   0.556291755   0.070113406
B        0.113428734   0.556984917   0.570339125
B        0.443348752   0.556296348   0.070116625
B        0.443557857   0.556987557   0.570342859
O       -0.010368981  -0.020728479   0.401307096
O       -0.000060946  -0.000115442   0.896548479
O        0.666520236   0.333044915   0.063558476
O        0.667001535   0.334011580   0.563272459
O        0.333744993   0.667513024   0.230098702
O        0.333610445   0.667219382   0.730029965
O        0.062256283   0.124522603   0.253950504
O        0.063816632   0.127620850   0.752679666
O        0.877540507   0.927186821   0.257225307
O        0.872795557   0.936461171   0.752354873
O        0.049634106   0.927193416   0.257221868
O        0.063677979   0.936477016   0.752366380
O        0.728948366   0.457896692   0.415254946
O        0.728504953   0.457002522   0.915672838
O        0.543109632   0.271555445   0.415761009
O        0.542663794   0.271130831   0.915744699
O        0.728444391   0.271547125   0.415765084
O        0.728482633   0.271128988   0.915756224
O        0.395586933   0.791173096   0.083208014
O        0.395276116   0.790540855   0.581448956
O        0.209302737   0.604761122   0.082470847
O        0.209784302   0.605183020   0.582075700
O        0.395452913   0.604765434   0.082476264
O        0.395401857   0.605186196   0.582084722
O        0.272972355   0.137287164   0.267307903
O        0.270655380   0.135439424   0.765476877
O        0.864308760   0.137282755   0.267306097
O        0.864796513   0.135443535   0.765469842
O        0.870049410   0.740122657   0.265738306
O        0.864703821   0.729407034   0.765428953
O        0.937403628   0.469368683   0.432970049
O        0.936912325   0.468354111   0.932943050
O        0.531967345   0.469378027   0.432979106
O        0.531439137   0.468357690   0.932944247
O        0.531444631   0.062892077   0.432854230
O        0.531422891   0.062835594   0.932860555
O        0.604459190   0.801722385   0.099214030
O        0.603299472   0.801773660   0.599904574
O        0.197262807   0.801724717   0.099196595
O        0.198475827   0.801772692   0.599892902
O        0.198082887   0.396166761   0.099727710
O        0.198750157   0.397495228   0.600359848
O        0.091793042   0.183580958   0.043415758
O        0.093405912   0.186815931   0.542452873
O        0.817264327   0.908230501   0.043307551
O        0.813335158   0.906699302   0.540483473
O        0.090979485   0.908216726   0.043305984
O        0.093359557   0.906703842   0.540472715
O        0.759113084   0.518232339   0.209880523
O        0.758523258   0.517037753   0.709101269
O        0.483787985   0.241247612   0.209347252
O        0.483549295   0.241963609   0.709272113
O        0.757453827   0.241239001   0.209356695
O        0.758417290   0.241972097   0.709270641
O        0.426128605   0.852264399   0.373137617
O        0.424890387   0.849780456   0.876808408
O        0.149901543   0.575299324   0.375967587
O        0.150011187   0.575154532   0.877012206
O        0.425387269   0.575286144   0.375994123
O        0.425151576   0.575143016   0.877028824
O        0.185950686   0.093026589   0.054706574
O        0.191758538   0.096172604   0.553117534
O        0.907084273   0.093030090   0.054701574
O        0.904409478   0.096172431   0.553119490
O        0.906012817   0.812018742   0.055125106
O        0.904760923   0.809519380   0.554590202
O        0.852919713   0.426408088   0.220250812
O        0.853329048   0.427054336   0.720160270
O        0.573483909   0.426416202   0.220255175
O        0.573733849   0.427046672   0.720162616
O        0.571634856   0.143279378   0.220375039
O        0.573496802   0.146987858   0.720337856
O        0.519951038   0.760517419   0.386557351
O        0.520595480   0.760321913   0.886883354
O        0.240560079   0.760529331   0.386558769
O        0.239724791   0.760326042   0.886872149
O        0.240167982   0.480349704   0.386900067
O        0.239894555   0.479784527   0.887275795
O        0.200449715   0.192744869   0.398410738
O        0.199613580   0.189261507   0.897738411
O        0.809801245   0.008459604   0.397607210
O        0.811061229   0.010190624   0.897460142
O        0.985825717   0.801670586   0.397015772
O        0.989514351   0.800311669   0.897587399
O        0.815840339   0.801672117   0.397024745
O        0.810802785   0.800312719   0.897593821
O        0.992294059   0.192748633   0.398410315
O        0.989660701   0.189257049   0.897730325
O        0.198659661   0.008463455   0.397603603
O        0.199139863   0.010193814   0.897461152
O        0.865367432   0.522750431   0.063925917
O        0.865409820   0.523421689   0.563691069
O        0.477024666   0.342379741   0.064140200
O        0.477718988   0.343376413   0.564198790
O        0.657317350   0.133981550   0.064085965
O        0.657447494   0.134750152   0.564072275
O        0.476666925   0.133987230   0.064080609
O        0.477304865   0.134745818   0.564073681
O        0.657380240   0.522751029   0.063926405
O        0.658017222   0.523426682   0.563697685
O        0.865346778   0.342363376   0.064137873
O        0.865654927   0.343372808   0.564195965
O        0.535442156   0.856646370   0.230332773
O        0.531075301   0.856335739   0.730672014
O        0.143446166   0.675424753   0.230484417
O        0.143994679   0.675159722   0.730708757
O        0.323832874   0.467636766   0.230814351
O        0.325242400   0.469306511   0.731075989
O        0.143795811   0.467638316   0.230805435
O        0.144071100   0.469306540   0.731071524
O        0.321199357   0.856649087   0.230328935
O        0.325263949   0.856332923   0.730664341
O        0.531945769   0.675389446   0.230491305
O        0.531160127   0.675152239   0.730720260
O        0.284538586   0.286114940   0.050347872
O        0.285452830   0.287666547   0.550584461
O        0.714128054  -0.002069788   0.049635833
O        0.712982355  -0.001905094   0.549759471
O        1.001724844   0.715345894   0.050236966
O        1.002283325   0.715366749   0.548162271
O        0.713622111   0.715354855   0.050250607
O        0.713084158   0.715366216   0.548172588
O        1.001580959   0.286115088   0.050339547
O        1.002212518   0.287666777   0.550583312
O        0.283808012  -0.002070124   0.049629556
O        0.285113377  -0.001897962   0.549758416
O        0.950758063   0.619514396   0.216511977
O        0.951515383   0.619770831   0.716033635
O        0.380614122   0.331799319   0.216714747
O        0.381035648   0.332418520   0.716991337
O        0.669906426   0.048142045   0.216130424
O        0.668092365   0.048868237   0.716636459
O        0.378225307   0.048146869   0.216121111
O        0.380782840   0.048859086   0.716636515
O        0.668753626   0.619518841   0.216513815
O        0.668251852   0.619762173   0.716046228
O        0.951176924   0.331793620   0.216710071
O        0.951388495   0.332416630   0.716987401
O        0.619134218   0.953617637   0.382695997
O        0.617838953   0.953026744   0.883309328
O        0.047692911   0.666259977   0.383217967
O        0.046837206   0.664719897   0.883214245
O        0.335823561   0.382720576   0.383297092
O        0.335282631   0.382282963   0.883640849
O        0.046887583   0.382727436   0.383287667
O        0.047007202   0.382288043   0.883637453
O        0.334488356   0.953628664   0.382688080
O        0.335192920   0.953026984   0.883306341
O        0.618559923   0.666256644   0.383224446
O        0.617887793   0.664726736   0.883224557
O        0.210329834   0.271096338   0.231483604
O        0.211808120   0.273840420   0.732184293
O        0.735803675   0.941353015   0.229804616
O        0.726573025   0.938235406   0.731764138
O        0.061444349   0.787797448   0.233094912
O        0.061787089   0.788548632   0.731415924
O        0.726318095   0.787795063   0.233125224
O        0.726752362   0.788538998   0.731425036
O        0.060766362   0.271101388   0.231484597
O        0.062043648   0.273841826   0.732180583
O        0.205535440   0.941347922   0.229802338
O        0.211667071   0.938237368   0.731761141
O        0.877343950   0.605381391   0.396803291
O        0.876928123   0.604374373   0.897476576
O        0.396118480   0.273233841   0.398433314
O        0.395422219   0.272429870   0.897867748
O        0.728104932   0.123361616   0.398104338
O        0.727645733   0.122846377   0.897833568
O        0.395264301   0.123370699   0.398096974
O        0.395216373   0.122848811   0.897826423
O        0.728038133   0.605383132   0.396808103
O        0.727450511   0.604375965   0.897486511
O        0.877112252   0.273223647   0.398436593
O        0.877020165   0.272425136   0.897866791
O        0.544098274   0.938289009   0.064925890
O        0.543663919   0.938033968   0.564238096
O        0.061619879   0.605300929   0.064479958
O        0.062310366   0.606170083   0.564449168
O        0.394267676   0.456128763   0.064718966
O        0.394743173   0.456948045   0.564911961
O        0.061851227   0.456124328   0.064715861
O        0.062203598   0.456945350   0.564908915
O        0.394199372   0.938293438   0.064926824
O        0.394356272   0.938020860   0.564225012
O        0.543677137   0.605305523   0.064482941
O        0.543860975   0.606175669   0.564452680
H       -0.009347537  -0.018693420   0.467807459
H       -0.000188910  -0.000154645   0.962345583
H        0.665807090   0.331733402   0.129401097
H        0.667250886   0.334539202   0.629132182
H        0.333506062   0.667079432   0.295964358
H        0.333597437   0.667272464   0.795876338
H        0.266619105   0.133794251   0.200757963
H        0.267924961   0.134129854   0.698678136
H        0.867165179   0.133784524   0.200756165
H        0.866211662   0.134155719   0.698669919
H        0.872098270   0.744220560   0.198743472
H        0.866077100   0.732155319   0.698658558
H        0.936356150   0.468194955   0.366204724
H        0.935951716   0.467659605   0.866146853
H        0.531852257   0.468221345   0.366213859
H        0.531683917   0.467664067   0.866148079
H        0.532158245   0.064328896   0.366071154
H        0.531965811   0.063919174   0.866065940
H        0.603881784   0.801419508   0.032389365
H        0.602983044   0.801840902   0.533156678
H        0.197537162   0.801431955   0.032371663
H        0.198879482   0.801827058   0.533144709
H        0.198405531   0.396805511   0.032914513
H        0.198579191   0.397150050   0.533609508
