# Supplementary material for: Effect of Fe–Fe interactions and X-site vacancy ordering on the OH-stretching spectrum of foitite
Source: Copernicus journal article supplement (doi:10.5194/ejm-35-105-2023), 2023-02-16
Supplement: Supplementary file 1 [file ejm-35-105-2023-supplement.zip › model_5.cif]

#======================================================================

# CRYSTAL DATA

#----------------------------------------------------------------------

data_VESTA_phase_1


_pd_phase_name                         
_cell_length_a 16.1067867
_cell_length_b 16.1067867
_cell_length_c 14.55806160
_cell_angle_alpha                      90
_cell_angle_beta                       90
_cell_angle_gamma                      120
_symmetry_space_group_name_H-M         'P1'
_symmetry_Int_Tables_number            1

loop_
_symmetry_equiv_pos_as_xyz
   'x, y, z'

loop_
   _atom_site_label
   _atom_site_fract_x
   _atom_site_fract_y
   _atom_site_fract_z
Na       0.666829991   0.333467903   0.304540415
Na       0.665848491   0.332945560   0.804784111
Na       0.333103536   0.666526086   0.471956188
Na       0.333168656   0.666521503   0.971097653
Fe       0.125657663   0.062826771   0.323022752
Mg       0.124240686   0.062123874   0.821938718
Al       0.934945644   0.062996501   0.327097405
Mg       0.938014201   0.062141030   0.821910709
Al       0.934955041   0.871957487   0.327076224
Mg       0.938015846   0.875879601   0.821940132
Mg       0.794102579   0.397058212   0.488764420
Mg       0.792886550   0.396446656   0.989700807
Mg       0.603907515   0.397178745   0.489487336
Mg       0.602842342   0.396429926   0.989548358
Mg       0.603896563   0.206721973   0.489418866
Mg       0.602846861   0.206424145   0.989530029
Mg       0.460196170   0.730110975   0.155545054
Mg       0.459854129   0.729936316   0.656438905
Mg       0.269759940   0.730140241   0.155876951
Mg       0.270221071   0.730057405   0.656476072
Mg       0.269749127   0.539633558   0.155946423
Mg       0.270226178   0.540188272   0.656491851
Al       0.298855635   0.260967874   0.316328518
Al       0.297523345   0.260714826   0.816424288
Al       0.737157926   0.035256644   0.315806769
Al       0.739224052   0.036832329   0.816161908
Al       0.965132865   0.702061502   0.316371782
Al       0.963101137   0.702315783   0.816199560
Al       0.737161336   0.701928280   0.315811055
Al       0.739224168   0.702396346   0.816179606
Al       0.965129211   0.263080202   0.316384969
Al       0.963104287   0.260794084   0.816179910
Al       0.298864375   0.037904108   0.316317781
Al       0.297521986   0.036818393   0.816424990
Al       0.966108729   0.595851348   0.483034389
Al       0.964703012   0.595292982   0.982659360
Al       0.404800823   0.370244247   0.483318455
Al       0.403961200   0.369367691   0.982969749
Al       0.629789872   0.034355789   0.482826009
Al       0.630028321   0.034882702   0.982346398
Al       0.404795281   0.034561138   0.483311068
Al       0.403969928   0.034610476   0.982961579
Al       0.629803170   0.595441282   0.482836432
Al       0.630021718   0.595152209   0.982366707
Al       0.966112129   0.370272004   0.483034423
Al       0.964701099   0.369406023   0.982649472
Al       0.632489887   0.928508504   0.147615371
Al       0.631726444   0.928241994   0.650095061
Al       0.071265559   0.702933754   0.148406993
Al       0.072067285   0.703799293   0.650259166
Al       0.294509918   0.365868951   0.148762985
Al       0.296970216   0.368400549   0.650537089
Al       0.071259294   0.368322222   0.148405297
Al       0.072084617   0.368294801   0.650249308
Al       0.294524171   0.928656720   0.148752165
Al       0.296974333   0.928588722   0.650540980
Al       0.632479712   0.703993481   0.147625115
Al       0.631738333   0.703499712   0.650099858
Si       0.191463375   0.189568718   0.008606589
Si       0.193617935   0.190705879   0.509299670
Si       0.810010807   0.002090522   0.008500779
Si       0.810395606   0.002612265   0.509771528
Si       0.997561700   0.807514250   0.008734292
Si       0.997728393   0.808685166   0.510436718
Si       0.810002950   0.807919634   0.008514597
Si       0.810409058   0.807809575   0.509765436
Si       0.997561029   0.190044468   0.008712671
Si       0.997718865   0.189040958   0.510461177
Si       0.191465313   0.001900775   0.008611242
Si       0.193633262   0.002919457   0.509279783
Si       0.858579473   0.523886046   0.174817639
Si       0.859656081   0.524431553   0.673655033
Si       0.475265919   0.335033578   0.174896816
Si       0.476203132   0.335450840   0.674418283
Si       0.664537985   0.140283165   0.174667046
Si       0.665214972   0.140756642   0.673898338
Si       0.475278577   0.140249534   0.174889542
Si       0.476205026   0.140769788   0.674398353
Si       0.664536661   0.524269162   0.174682754
Si       0.665212787   0.524459560   0.673936016
Si       0.858579524   0.334697839   0.174809712
Si       0.859668969   0.335243166   0.673638431
Si       0.526400999   0.857429401   0.340455684
Si       0.525761180   0.857424044   0.841263662
Si       0.142869836   0.668688293   0.341069049
Si       0.142438339   0.668344639   0.841424858
Si       0.331488584   0.473609134   0.340818268
Si       0.331513253   0.474162272   0.841517341
Si       0.142865477   0.474189512   0.341078687
Si       0.142437451   0.474107464   0.841420458
Si       0.331492423   0.857892838   0.340794498
Si       0.331515316   0.857369047   0.841516319
Si       0.526395809   0.668976269   0.340467148
Si       0.525759785   0.668351162   0.841267846
B        0.106948103   0.219246707   0.241148250
B        0.110759609   0.221216779   0.738936016
B        0.781040509   0.890532009   0.240807370
B        0.778944764   0.889473083   0.738644878
B        0.106957183   0.887706498   0.241127064
B        0.110756155   0.889547294   0.738942795
B        0.777720398   0.555068233   0.402306781
B        0.776565836   0.553399966   0.903406961
B        0.447103548   0.223558640   0.403568130
B        0.446030151   0.223022559   0.903713351
B        0.777711704   0.222671417   0.402296904
B        0.776566715   0.223178998   0.903379039
B        0.443253772   0.887356468   0.070645375
B        0.443654856   0.886813969   0.569909557
B        0.112637311   0.556311612   0.070435110
B        0.113230313   0.556623541   0.569946853
B        0.443244714   0.555892051   0.070692079
B        0.443669183   0.556852786   0.569927960
O       -0.016057767  -0.008032933   0.397708756
O       -0.000132270  -0.000067221   0.900801216
O        0.666214679   0.333109890   0.063800127
O        0.667967477   0.333960037   0.561995058
O        0.333606848   0.666842123   0.230228546
O        0.333437730   0.666746153   0.729731405
O        0.051938722   0.123262566   0.263412866
O        0.063498606   0.126947095   0.753805870
O        0.877726225   0.938877809   0.264561427
O        0.873171438   0.936586691   0.753671594
O        0.051947179   0.928689833   0.263369125
O        0.063494843   0.936554411   0.753813464
O        0.729770135   0.458931159   0.414804074
O        0.728254857   0.456960504   0.915868120
O        0.543571915   0.271797207   0.415391191
O        0.542529324   0.271271112   0.915870532
O        0.729766105   0.270865698   0.414763760
O        0.728257042   0.271307166   0.915851018
O        0.395350883   0.790881142   0.083135888
O        0.395405638   0.790416283   0.581563173
O        0.209064844   0.604523060   0.082681028
O        0.209533561   0.604767049   0.581850455
O        0.395337887   0.604460349   0.083193233
O        0.395411051   0.604989786   0.581606853
O        0.272458123   0.136232969   0.265932031
O        0.270556466   0.135278044   0.766038808
O        0.872166205   0.127000812   0.264694860
O        0.864688341   0.135258876   0.765984072
O        0.872171635   0.745191404   0.264665609
O        0.864688319   0.729431111   0.766028352
O        0.937774015   0.468904988   0.431650225
O        0.936752882   0.468380945   0.933562138
O        0.532293975   0.469640460   0.432144458
O        0.531236189   0.468394219   0.933413516
O        0.532266809   0.062639727   0.432135651
O        0.531234456   0.062851056   0.933397876
O        0.604376009   0.802195315   0.099046833
O        0.603597272   0.801804339   0.599886449
O        0.197243080   0.801612351   0.099763839
O        0.198372179   0.801753430   0.600114171
O        0.197239980   0.395639204   0.099782103
O        0.198372861   0.396637385   0.600091604
O        0.092940968   0.186823970   0.043454910
O        0.093136478   0.185121998   0.540475214
O        0.813375387   0.906691080   0.043647491
O        0.812774158   0.906396468   0.540201075
O        0.092951764   0.906113853   0.043470887
O        0.093185179   0.907984663   0.540442737
O        0.758054129   0.517154821   0.210365022
O        0.758558873   0.516583410   0.707993043
O        0.483978441   0.241994418   0.209760972
O        0.484060100   0.242035650   0.708457540
O        0.758057996   0.240904366   0.210344966
O        0.758571859   0.241975695   0.707946384
O        0.427310971   0.854000620   0.373792575
O        0.424812453   0.849609012   0.876672196
O        0.145700890   0.572856307   0.375973712
O        0.149981876   0.574997216   0.876689613
O        0.427308247   0.573318278   0.373817412
O        0.424801175   0.575226737   0.876676220
O        0.189926074   0.094965799   0.054589420
O        0.192562033   0.096275491   0.553909448
O        0.904037816   0.095628246   0.055361464
O        0.904681176   0.094701251   0.555658491
O        0.904035657   0.808412319   0.055376237
O        0.904717126   0.810035358   0.555630277
O        0.853550657   0.426776483   0.220626248
O        0.853916723   0.426960166   0.718412009
O        0.572111725   0.427745885   0.220669970
O        0.573754999   0.427199032   0.719332465
O        0.572133681   0.144409545   0.220661333
O        0.573776895   0.146597179   0.719288749
O        0.517081607   0.758548364   0.386038830
O        0.520651526   0.760334932   0.886583904
O        0.241961552   0.758483557   0.386178079
O        0.239653267   0.760113662   0.886797583
O        0.241945579   0.483470745   0.386196183
O        0.239649311   0.479553422   0.886798699
O        0.200000272   0.190514855   0.397938434
O        0.199231546   0.189398681   0.898107157
O        0.817291756   0.013167568   0.396905172
O        0.810579305   0.010074719   0.898073596
O        0.985040348   0.804206394   0.397981410
O        0.989374923   0.800054628   0.898283591
O        0.817304526   0.804144299   0.396895791
O        0.810568870   0.800516239   0.898086930
O        0.985029232   0.180836972   0.398007365
O        0.989378657   0.189328077   0.898261033
O        0.200009976   0.009515529   0.397921728
O        0.199232618   0.009851882   0.898112424
O        0.864992879   0.522758962   0.064446333
O        0.866029928   0.523598097   0.562749844
O        0.476679629   0.342394083   0.064467794
O        0.477854238   0.343435018   0.563642064
O        0.657289430   0.134352596   0.064302487
O        0.658395782   0.134549282   0.562992934
O        0.476693922   0.134299105   0.064460257
O        0.477863138   0.134431916   0.563623988
O        0.657297688   0.522951444   0.064318588
O        0.658406362   0.523862854   0.563030215
O        0.864993163   0.342236390   0.064437756
O        0.866034149   0.342463028   0.562732659
O        0.534623247   0.856726752   0.230146161
O        0.531199011   0.856263909   0.730511171
O        0.142966994   0.675578807   0.230610155
O        0.143812710   0.674996255   0.730676599
O        0.321210065   0.464804251   0.230573467
O        0.325121340   0.468976521   0.730758289
O        0.142959304   0.467382018   0.230621123
O        0.143824094   0.468835128   0.730672663
O        0.321217312   0.856412910   0.230549065
O        0.325125358   0.856163322   0.730757575
O        0.534610732   0.677888367   0.230156113
O        0.531202108   0.674942900   0.730514483
O        0.284227668   0.286315171   0.050025210
O        0.285349877   0.287533086   0.549969473
O        0.713097799  -0.002198278   0.049778422
O        0.713262622  -0.002174332   0.547703174
O        1.001559438   0.714860617   0.050384146
O        1.002607016   0.716112283   0.548118538
O        0.713092201   0.715296397   0.049794918
O        0.713288952   0.715454207   0.547708504
O        1.001559110   0.286693479   0.050370261
O        1.002632541   0.286516979   0.548121892
O        0.284235008  -0.002077924   0.050021448
O        0.285367893  -0.002159451   0.549958716
O        0.950059432   0.620177305   0.217163137
O        0.951441737   0.619878994   0.715747974
O        0.378819440   0.330587177   0.216675869
O        0.380856114   0.331934689   0.716640353
O        0.670425935   0.048996216   0.216480973
O        0.668641371   0.048724583   0.715740043
O        0.378833329   0.048246180   0.216667047
O        0.380866004   0.048934621   0.716634939
O        0.670435128   0.621451571   0.216490319
O        0.668651743   0.619929195   0.715760911
O        0.950056428   0.329884284   0.217160033
O        0.951451356   0.331576716   0.715728196
O        0.620269771   0.951814366   0.382917224
O        0.617668284   0.953207584   0.883036085
O        0.048519919   0.668393141   0.383598339
O        0.046625108   0.664426522   0.883234206
O        0.334057813   0.381280543   0.383251110
O        0.335325083   0.382305401   0.883388356
O        0.048511692   0.380136123   0.383605422
O        0.046622378   0.382209517   0.883221592
O        0.334060021   0.952789387   0.383226115
O        0.335322993   0.953037176   0.883382927
O        0.620273091   0.668474055   0.382930683
O        0.617659904   0.664468846   0.883052811
O        0.205938555   0.264650441   0.230750065
O        0.211523556   0.273161630   0.731938350
O        0.732142994   0.940384601   0.231574110
O        0.727124385   0.938440873   0.731360758
O        0.061027723   0.788609651   0.233152238
O        0.061636880   0.788702595   0.731641962
O        0.732129523   0.791781068   0.231570960
O        0.727138724   0.788686287   0.731362244
O        0.061017803   0.272412329   0.233165725
O        0.061648317   0.272949793   0.731626072
O        0.205949468   0.941295463   0.230751326
O        0.211521130   0.938366607   0.731942177
O        0.878117372   0.606910040   0.396609735
O        0.876738203   0.604113246   0.897537832
O        0.396038470   0.272791426   0.397881708
O        0.395305130   0.272429878   0.897972514
O        0.729049600   0.122274577   0.396168744
O        0.727284947   0.123011019   0.897532076
O        0.396050031   0.123260351   0.397873461
O        0.395304163   0.122890255   0.897970846
O        0.729063119   0.606806620   0.396186741
O        0.727284964   0.604287635   0.897564214
O        0.878110660   0.271215366   0.396616427
O        0.876739256   0.272635583   0.897513940
O        0.543561522   0.938348019   0.064969833
O        0.544005037   0.937759807   0.563917872
O        0.061438512   0.605273920   0.064990308
O        0.062161826   0.605888469   0.564172665
O        0.393860481   0.455842340   0.065218364
O        0.394795761   0.456778075   0.564465412
O        0.061434428   0.456151718   0.064984293
O        0.062153508   0.456290550   0.564173852
O        0.393867137   0.938021704   0.065190552
O        0.394777800   0.938012389   0.564457194
O        0.543551316   0.605209052   0.065002118
O        0.544018737   0.606265306   0.563918669
H       -0.007711091  -0.003870815   0.463834061
H        0.000389003   0.000177271   0.967020691
H        0.664438422   0.332188432   0.129624064
H        0.668682169   0.334159524   0.627874497
H        0.333601494   0.667016016   0.296102136
H        0.333294309   0.666757556   0.795588883
H        0.266079439   0.133045918   0.199264241
H        0.266672882   0.133327870   0.699304111
H        0.874722968   0.124900246   0.197522267
H        0.866561020   0.133248539   0.699285266
H        0.874731426   0.749846637   0.197489479
H        0.866572123   0.733329542   0.699332999
H        0.936228886   0.468127614   0.364853629
H        0.936175659   0.468100271   0.866786797
H        0.532424326   0.468150559   0.365354567
H        0.531341659   0.467856042   0.866634922
H        0.532386420   0.064228510   0.365346544
H        0.531312682   0.063461459   0.866619926
H        0.605700415   0.802870523   0.032237376
H        0.603062491   0.801533319   0.533172505
H        0.196534350   0.802461130   0.032974952
H        0.198537531   0.802091860   0.533399896
H        0.196546595   0.394123178   0.032992783
H        0.198538517   0.396469013   0.533375643
