# Supplementary material for: Effect of Fe–Fe interactions and X-site vacancy ordering on the OH-stretching spectrum of foitite
Source: Copernicus journal article supplement (doi:10.5194/ejm-35-105-2023), 2023-02-16
Supplement: Supplementary file 1 [file ejm-35-105-2023-supplement.zip › model_6.cif]

#======================================================================

# CRYSTAL DATA

#----------------------------------------------------------------------

data_VESTA_phase_1


_pd_phase_name                         
_cell_length_a 16.1067867
_cell_length_b 16.1067867
_cell_length_c 14.55806160
_cell_angle_alpha                      90
_cell_angle_beta                       90
_cell_angle_gamma                      120
_symmetry_space_group_name_H-M         'P1'
_symmetry_Int_Tables_number            1

loop_
_symmetry_equiv_pos_as_xyz
   'x, y, z'

loop_
   _atom_site_label
   _atom_site_fract_x
   _atom_site_fract_y
   _atom_site_fract_z
Na       0.666131322   0.332257354   0.304586285
Na       0.666310610   0.332619338   0.804741507
Na       0.333023949   0.666039331   0.471449175
Na       0.334207625   0.668411950   0.970961062
Fea      0.111508691   0.061354283   0.324721452
Mg       0.124380247   0.062405331   0.821946589
Feb      0.949832010   0.061354407   0.324723714
Mg       0.938013794   0.062404881   0.821948174
Al       0.933027423   0.866067941   0.328292285
Mg       0.937980423   0.875971842   0.822138214
Mg       0.793245140   0.396166403   0.489601003
Mg       0.793222625   0.396457729   0.989412502
Mg       0.602905003   0.396166659   0.489592005
Mg       0.603217846   0.396458319   0.989401971
Mg       0.603002743   0.206021349   0.489078936
Mg       0.603087398   0.206190475   0.989876282
Mg       0.460791987   0.731079024   0.155805951
Mg       0.460026452   0.730373870   0.656037874
Mg       0.270270579   0.731079039   0.155794231
Mg       0.270333146   0.730373684   0.656030264
Mg       0.270640144   0.541295921   0.155882952
Mg       0.270144782   0.540304451   0.656436828
Al       0.298010903   0.261487454   0.315825957
Al       0.297798615   0.260972974   0.816114733
Al       0.743640717   0.038998555   0.315588551
Al       0.739321054   0.036876476   0.816161188
Al       0.964314247   0.699199911   0.316314977
Al       0.963182593   0.702462923   0.816056369
Al       0.734871462   0.699199992   0.316316383
Al       0.739268735   0.702462435   0.816056812
Al       0.963464767   0.261488528   0.315827033
Al       0.963163197   0.260972487   0.816115957
Al       0.295345101   0.038998728   0.315586348
Al       0.297543733   0.036876160   0.816159661
Al       0.965365769   0.594522940   0.483426681
Al       0.965062126   0.595605887   0.982548941
Al       0.404015376   0.369847260   0.483262462
Al       0.404633452   0.369616347   0.982775583
Al       0.630796433   0.034671085   0.482297775
Al       0.630398511   0.034567261   0.982985105
Al       0.403861581   0.034670154   0.482295400
Al       0.404156520   0.034566223   0.982983057
Al       0.629143822   0.594523033   0.483426888
Al       0.630530719   0.595606925   0.982549689
Al       0.965818973   0.369847921   0.483264114
Al       0.964968921   0.369615385   0.982776549
Al       0.635040412   0.929193690   0.149258915
Al       0.632130547   0.928711296   0.649686142
Al       0.071723087   0.702951707   0.148704817
Al       0.071859999   0.703499677   0.650035006
Al       0.298303975   0.370081887   0.148667742
Al       0.296505368   0.368284497   0.650178112
Al       0.071764259   0.370081963   0.148667901
Al       0.071766041   0.368284333   0.650178853
Al       0.294140836   0.929193931   0.149256546
Al       0.296569423   0.928711163   0.649684367
Al       0.631214883   0.702953284   0.148707068
Al       0.631628003   0.703500479   0.650036089
Si       0.192776048   0.191013662   0.008485724
Si       0.192247695   0.190866840   0.509412808
Si       0.810760253   0.002461256   0.008457541
Si       0.810170312   0.002459337   0.508343152
Si       0.997753836   0.807705629   0.008689772
Si       0.997236112   0.807042699   0.510028164
Si       0.809939498   0.807705309   0.008690400
Si       0.809795149   0.807042739   0.510029593
Si       0.998227321   0.191013597   0.008486528
Si       0.998608504   0.190867636   0.509413489
Si       0.191689110   0.002460761   0.008456122
Si       0.192277616   0.002458820   0.508340819
Si       0.858813130   0.523743545   0.174306352
Si       0.859238152   0.524077775   0.674528052
Si       0.476395597   0.334610440   0.174752051
Si       0.475918992   0.335280804   0.674555164
Si       0.664443086   0.139183035   0.174984856
Si       0.664854074   0.140637514   0.674063026
Si       0.474727522   0.139183424   0.174983281
Si       0.475770628   0.140637352   0.674061186
Si       0.664912394   0.523743755   0.174306692
Si       0.664826549   0.524077724   0.674526677
Si       0.858199841   0.334609543   0.174753569
Si       0.859348891   0.335280622   0.674558032
Si       0.527371695   0.858757056   0.340775702
Si       0.525950142   0.857603085   0.841057237
Si       0.143410500   0.669045179   0.341228268
Si       0.142636865   0.668540680   0.841263738
Si       0.331962166   0.474733198   0.340929741
Si       0.331636773   0.474231333   0.841412347
Si       0.142759166   0.474733501   0.340929724
Si       0.142581398   0.474230510   0.841412635
Si       0.331371035   0.858757748   0.340772001
Si       0.331641600   0.857602438   0.841054982
Si       0.525619864   0.669045798   0.341232290
Si       0.525892419   0.668541877   0.841265668
B        0.113158755   0.226331709   0.234751516
B        0.110702820   0.221417298   0.738900543
B        0.780800070   0.886630437   0.241359613
B        0.778886399   0.889507239   0.738731480
B        0.105816474   0.886630639   0.241356142
B        0.110609639   0.889507202   0.738730402
B        0.776474402   0.552962157   0.402500735
B        0.776741004   0.553493635   0.903244838
B        0.445705058   0.223214654   0.403476255
B        0.446420093   0.223102805   0.903443044
B        0.777498537   0.223215174   0.403480785
B        0.776671305   0.223103077   0.903447872
B        0.444033618   0.888077923   0.070986546
B        0.443601172   0.887212985   0.569559997
B        0.113424050   0.557216937   0.069734201
B        0.113291470   0.556613410   0.570262429
B        0.443780658   0.557218116   0.069738145
B        0.443310400   0.556613343   0.570265638
O       -0.012761718  -0.025511113   0.407974176
O        0.000048371   0.000106270   0.900787152
O        0.666646552   0.333321920   0.063539347
O        0.666440977   0.332906988   0.562732829
O        0.334178610   0.668383042   0.229759604
O        0.333584137   0.667190336   0.729652938
O        0.064790407   0.129597903   0.243547188
O        0.063588491   0.127189091   0.754146546
O        0.876016201   0.925256488   0.262392470
O        0.873127794   0.936567942   0.753860465
O        0.049226260   0.925256382   0.262390182
O        0.063428984   0.936567758   0.753860029
O        0.728421648   0.456853692   0.415268489
O        0.728514315   0.457038952   0.915609867
O        0.542229459   0.271157346   0.415373030
O        0.542908493   0.271193906   0.915772403
O        0.728917460   0.271158190   0.415380977
O        0.728274889   0.271194892   0.915780947
O        0.395759251   0.791526966   0.083128071
O        0.395333463   0.790676127   0.581254709
O        0.209850740   0.605728932   0.081759551
O        0.209698060   0.605027532   0.581990065
O        0.395866711   0.605730449   0.081768310
O        0.395319150   0.605028237   0.581997223
O        0.270909046   0.137756230   0.265489082
O        0.270552354   0.135311350   0.765576715
O        0.866836309   0.137754865   0.265491018
O        0.864748694   0.135309887   0.765578506
O        0.869474805   0.738964849   0.265426077
O        0.864769194   0.729550301   0.765758263
O        0.937356883   0.468866753   0.432850781
O        0.936984983   0.468651451   0.933175533
O        0.531496824   0.468865548   0.432848229
O        0.531653284   0.468651201   0.933172213
O        0.531407974   0.062828961   0.432156950
O        0.531386936   0.062786053   0.933407477
O        0.604509497   0.801928993   0.099731265
O        0.603374800   0.801595750   0.599771443
O        0.197407427   0.801927807   0.099727487
O        0.198208819   0.801594315   0.599768958
O        0.199346930   0.398707514   0.099491539
O        0.198518036   0.397050411   0.600084449
O        0.094763162   0.189536168   0.041916832
O        0.093469542   0.186950002   0.543452644
O        0.813376248   0.906540336   0.042909762
O        0.812846204   0.905971380   0.540486674
O        0.093152751   0.906539773   0.042909999
O        0.093114495   0.905970474   0.540484670
O        0.760095349   0.520208691   0.209855436
O        0.758286796   0.516586967   0.708982900
O        0.484061506   0.241107615   0.209579566
O        0.483764607   0.241874615   0.708614513
O        0.757035671   0.241103618   0.209584393
O        0.758099171   0.241872444   0.708618600
O        0.426535393   0.853086516   0.373055733
O        0.424785032   0.849581522   0.876190230
O        0.149621257   0.575265723   0.376644147
O        0.150316442   0.575296083   0.876491719
O        0.425633367   0.575262064   0.376647919
O        0.424968428   0.575295976   0.876492442
O        0.190570494   0.095855129   0.054183455
O        0.190728171   0.095630946   0.553310518
O        0.905274564   0.095854937   0.054183969
O        0.904892619   0.095631718   0.553311434
O        0.904133681   0.808279063   0.054971833
O        0.904421230   0.808853256   0.555563298
O        0.850707240   0.425582283   0.220084876
O        0.853416637   0.426805643   0.719998321
O        0.574856979   0.425584347   0.220087420
O        0.573376797   0.426804482   0.719995054
O        0.570998027   0.142009142   0.220581619
O        0.573235177   0.146483682   0.719251419
O        0.519540127   0.760428366   0.386615038
O        0.520518300   0.760378830   0.886495464
O        0.240871226   0.760430161   0.386608105
O        0.239849837   0.760376889   0.886491420
O        0.240627480   0.481266917   0.385887445
O        0.239768767   0.479550057   0.886771863
O        0.197824250   0.191350671   0.397919619
O        0.200289631   0.189885643   0.897951153
O        0.812630320   0.010081129   0.397407289
O        0.810772508   0.010250593   0.897890952
O        0.984109234   0.798913254   0.397924527
O        0.989604574   0.800127342   0.898149887
O        0.814791893   0.798912194   0.397926063
O        0.810510613   0.800126451   0.898150508
O        0.993516042   0.191352312   0.397920386
O        0.989585877   0.189885638   0.897951923
O        0.197438647   0.010080767   0.397405054
O        0.199465710   0.010250247   0.897889518
O        0.865370956   0.522822410   0.063931668
O        0.865183708   0.522793854   0.563724221
O        0.477486918   0.342639009   0.064223093
O        0.477261059   0.343124601   0.563910403
O        0.657437526   0.134167031   0.064396004
O        0.657603773   0.134398471   0.563370364
O        0.476714052   0.134166661   0.064394314
O        0.476777475   0.134398929   0.563368235
O        0.657429893   0.522819372   0.063932233
O        0.657593539   0.522792411   0.563723252
O        0.865136904   0.342637802   0.064224564
O        0.865849391   0.343125152   0.563913105
O        0.535739469   0.856967189   0.230440457
O        0.531381164   0.856461584   0.730359438
O        0.143729795   0.675437347   0.230632920
O        0.143965717   0.675240287   0.730579141
O        0.325870706   0.469975059   0.230259149
O        0.325042449   0.469012982   0.730720816
O        0.144090980   0.469974828   0.230258979
O        0.143955838   0.469013093   0.730720851
O        0.321216068   0.856967749   0.230436553
O        0.325068384   0.856460906   0.730357296
O        0.531693062   0.675439988   0.230636984
O        0.531263141   0.675242738   0.730581218
O        0.285700469   0.287571438   0.050080115
O        0.285160115   0.287245683   0.549993100
O        0.713712695  -0.002026606   0.049596662
O        0.713472675  -0.002041900   0.549470220
O        1.001809847   0.715096423   0.050395098
O        1.001909565   0.714635441   0.548748802
O        0.713274563   0.715096405   0.050396867
O        0.712714467   0.714635251   0.548750102
O        1.001858923   0.287570619   0.050080899
O        1.002073883   0.287245916   0.549993896
O        0.284248756  -0.002027989   0.049593775
O        0.284473491  -0.002043272   0.549467899
O        0.951225332   0.618789434   0.216812050
O        0.951302850   0.619577186   0.716242714
O        0.381861298   0.332951448   0.217011678
O        0.380719663   0.332013528   0.716698762
O        0.670988005   0.048350786   0.216511269
O        0.668324148   0.048824741   0.716381272
O        0.377349733   0.048351843   0.216509050
O        0.380488724   0.048824230   0.716379784
O        0.667548247   0.618790370   0.216812786
O        0.668261952   0.619576822   0.716243196
O        0.951077130   0.332953239   0.217012841
O        0.951281323   0.332012680   0.716700063
O        0.619908222   0.953390872   0.382863585
O        0.617696250   0.953152879   0.883173793
O        0.047618987   0.665818846   0.383538166
O        0.046888171   0.664688863   0.883117283
O        0.335219429   0.382669529   0.383083268
O        0.335784013   0.382561953   0.883219269
O        0.047438324   0.382670913   0.383084317
O        0.046765396   0.382561086   0.883220199
O        0.333468269   0.953390916   0.382860788
O        0.335445214   0.953152154   0.883171846
O        0.618187101   0.665821501   0.383540859
O        0.617789277   0.664689320   0.883118069
O        0.212726821   0.275675126   0.231172497
O        0.211514735   0.273336904   0.731963992
O        0.736339625   0.941288552   0.230262439
O        0.726902404   0.938254781   0.731819648
O        0.061398007   0.787192249   0.233769838
O        0.061505570   0.788636792   0.731462132
O        0.725779976   0.787192284   0.233773533
O        0.727119941   0.788636722   0.731462977
O        0.062935723   0.275676815   0.231173389
O        0.061811233   0.273337595   0.731964818
O        0.204935089   0.941289516   0.230258798
O        0.211341004   0.938254991   0.731817776
O        0.876825887   0.604110754   0.396606730
O        0.876902939   0.604328733   0.897449839
O        0.394847963   0.272615474   0.398127009
O        0.395925120   0.272737334   0.897557027
O        0.728808447   0.123150242   0.397411266
O        0.727473897   0.122986019   0.897698745
O        0.394329893   0.123149572   0.397408335
O        0.395499775   0.122985537   0.897696386
O        0.727268800   0.604108276   0.396605748
O        0.727413278   0.604327913   0.897451032
O        0.877756198   0.272616006   0.398129178
O        0.876800535   0.272736421   0.897559392
O        0.544204892   0.938561720   0.065389114
O        0.543805929   0.938100560   0.563986125
O        0.062020195   0.605958018   0.064473324
O        0.062028298   0.605621637   0.564668460
O        0.394969299   0.457157460   0.064226254
O        0.394310764   0.456571390   0.564713943
O        0.062174782   0.457156092   0.064225495
O        0.062247849   0.456571230   0.564714072
O        0.394344916   0.938560396   0.065387030
O        0.394283028   0.938099615   0.563984436
O        0.543925258   0.605960338   0.064474522
O        0.543581528   0.605621637   0.564670219
H       -0.011894619  -0.023778672   0.474466850
H        0.000274694   0.000558979   0.967014276
H        0.665985260   0.332053840   0.129379538
H        0.665961271   0.331988963   0.628592404
H        0.333698649   0.667486060   0.295611679
H        0.333625966   0.667304348   0.795500369
H        0.263665322   0.134132551   0.198937266
H        0.266399416   0.133185886   0.698847566
H        0.870455950   0.134131863   0.198939073
H        0.866776046   0.133184937   0.698849318
H        0.872772786   0.745561076   0.198500223
H        0.866949339   0.733909924   0.699059641
H        0.936478517   0.468016116   0.366090897
H        0.936290309   0.468145969   0.866403211
H        0.531523510   0.468016524   0.366088271
H        0.531840093   0.468148322   0.866399890
H        0.532037644   0.064086655   0.365356623
H        0.531757421   0.063526243   0.866642488
H        0.606221882   0.802833274   0.032973069
H        0.603597369   0.801962102   0.533028868
H        0.196596663   0.802834547   0.032969289
H        0.198350109   0.801962212   0.533026359
H        0.198801746   0.397617319   0.032714469
H        0.198117529   0.396249861   0.533349279
