# Supplementary material for: Effect of Fe–Fe interactions and X-site vacancy ordering on the OH-stretching spectrum of foitite
Source: Copernicus journal article supplement (doi:10.5194/ejm-35-105-2023), 2023-02-16
Supplement: Supplementary file 1 [file ejm-35-105-2023-supplement.zip › model_7.cif]

#======================================================================

# CRYSTAL DATA

#----------------------------------------------------------------------

data_VESTA_phase_1


_pd_phase_name                         
_cell_length_a 16.1067867
_cell_length_b 16.1067867
_cell_length_c 14.55806160
_cell_angle_alpha                      90
_cell_angle_beta                       90
_cell_angle_gamma                      120
_symmetry_space_group_name_H-M         'P1'
_symmetry_Int_Tables_number            1

loop_
_symmetry_equiv_pos_as_xyz
   'x, y, z'

loop_
   _atom_site_label
   _atom_site_fract_x
   _atom_site_fract_y
   _atom_site_fract_z
Na      -0.002107580  -0.004233130   0.135082235
Na       0.666095768   0.332192762   0.304926696
Na       0.666340240   0.332684104   0.804664658
Na       0.333062165   0.666128112   0.471787769
Na       0.333990858   0.667984203   0.971221287
Fea      0.113448733   0.062555446   0.329879491
Mg       0.125089972   0.062863850   0.818634996
Feb      0.949103493   0.062555151   0.329877896
Mg       0.937766927   0.062863754   0.818625590
Al       0.932466028   0.864935536   0.329389634
Mg       0.937717693   0.875442523   0.819232132
Mg       0.793158063   0.396217744   0.489758588
Mg       0.793070805   0.396373953   0.989506674
Mg       0.603055681   0.396217591   0.489757972
Mg       0.603298479   0.396373814   0.989505480
Mg       0.603082199   0.206168677   0.489365316
Mg       0.603180883   0.206366248   0.989902670
Mg       0.460666595   0.730969045   0.156140038
Mg       0.459871836   0.730327147   0.656328403
Mg       0.270299015   0.730969103   0.156139814
Mg       0.270450699   0.730327535   0.656327949
Mg       0.270433323   0.540870482   0.156283861
Mg       0.270333988   0.540672085   0.656804720
Al       0.298576886   0.261882878   0.316565126
Al       0.298370883   0.261606096   0.815713664
Al       0.742905495   0.038921342   0.316325004
Al       0.738843217   0.036838671   0.815772677
Al       0.964506048   0.698811541   0.316730603
Al       0.963250630   0.701994086   0.815646244
Al       0.734302204   0.698811879   0.316730453
Al       0.738738261   0.701993088   0.815645828
Al       0.963302981   0.261883010   0.316564870
Al       0.963231651   0.261606581   0.815713219
Al       0.296012878   0.038921323   0.316325599
Al       0.297990278   0.036838980   0.815773562
Al       0.965387668   0.594346952   0.483627549
Al       0.964940486   0.595042640   0.982167986
Al       0.404433384   0.370157772   0.483603012
Al       0.405063842   0.369915051   0.982523509
Al       0.630496012   0.034710085   0.482637022
Al       0.630139459   0.034793302   0.982557571
Al       0.404210203   0.034710007   0.482637702
Al       0.404649223   0.034793252   0.982558039
Al       0.628955573   0.594346695   0.483627053
Al       0.630097745   0.595042217   0.982167626
Al       0.965721023   0.370157952   0.483602856
Al       0.964847326   0.369915539   0.982523282
Al       0.634778604   0.929324752   0.149133007
Al       0.631608040   0.928478253   0.649791376
Al       0.071714522   0.702800409   0.148656870
Al       0.072137393   0.703338084   0.650015349
Al       0.297944021   0.369441535   0.148866119
Al       0.296952645   0.369080675   0.650326680
Al       0.071493863   0.369441653   0.148865761
Al       0.072124547   0.369080517   0.650326233
Al       0.294543035   0.929324792   0.149133350
Al       0.296865881   0.928478701   0.649792469
Al       0.631082511   0.702800670   0.148656968
Al       0.631195583   0.703337108   0.650014716
Si       0.193004048   0.191312876   0.007415599
Si       0.192490952   0.191354082   0.510483760
Si       0.810718892   0.002489301   0.007484133
Si       0.809862487   0.002331046   0.509013436
Si       0.997765412   0.807450695   0.007718804
Si       0.997513754   0.807095951   0.510137421
Si       0.809681325   0.807450334   0.007718417
Si       0.809578333   0.807095806   0.510137435
Si       0.998304703   0.191313620   0.007413865
Si       0.998859998   0.191354123   0.510483163
Si       0.191765274   0.002488740   0.007486122
Si       0.192464994   0.002331016   0.509013984
Si       0.858909285   0.523741012   0.174339213
Si       0.859165728   0.524013564   0.674568140
Si       0.476255543   0.334720108   0.174797604
Si       0.476168178   0.335402511   0.674692306
Si       0.664518611   0.139312121   0.174957249
Si       0.664799463   0.140760170   0.674254825
Si       0.474790393   0.139312601   0.174957476
Si       0.475956089   0.140760133   0.674255234
Si       0.664827245   0.523741424   0.174338929
Si       0.664843539   0.524013045   0.674567940
Si       0.858460557   0.334719899   0.174797652
Si       0.859230687   0.335402833   0.674692139
Si       0.527416135   0.858795841   0.340863096
Si       0.525864028   0.857556573   0.841303115
Si       0.143563426   0.669075958   0.341327127
Si       0.142728911   0.668557184   0.841468357
Si       0.331669699   0.474404855   0.341228759
Si       0.331717925   0.474419216   0.841713030
Si       0.142731630   0.474405183   0.341228628
Si       0.142697306   0.474419290   0.841712804
Si       0.331376354   0.858796015   0.340863246
Si       0.331688298   0.857556556   0.841303776
Si       0.525508838   0.669075793   0.341327063
Si       0.525823973   0.668556979   0.841467927
B        0.112032379   0.224067828   0.234110399
B        0.111134812   0.222272828   0.738313431
B        0.781186385   0.887040670   0.240479001
B        0.778367904   0.889250340   0.738133053
B        0.105851485   0.887040037   0.240479997
B        0.110877505   0.889251958   0.738135285
B        0.776587640   0.553178693   0.402725790
B        0.776772140   0.553548183   0.903313370
B        0.445802968   0.223223609   0.403847845
B        0.446391595   0.223124804   0.903491883
B        0.777417493   0.223223693   0.403847895
B        0.776729274   0.223125024   0.903491988
B        0.444090954   0.888185364   0.071002879
B        0.443512767   0.887029430   0.569603964
B        0.113217860   0.556918895   0.069990496
B        0.113499272   0.556828865   0.570311510
B        0.443697516   0.556918762   0.069990862
B        0.443325686   0.556828769   0.570311357
O       -0.012870980  -0.025738140   0.407868298
O        0.000206528   0.000426857   0.896190018
O        0.666651171   0.333308679   0.063721725
O        0.666507496   0.333020003   0.562899460
O        0.334058225   0.668120611   0.230105907
O        0.333667092   0.667340402   0.730055832
O        0.062805864   0.125614047   0.241959145
O        0.063920243   0.127843029   0.752468010
O        0.878619292   0.926869844   0.258494326
O        0.872796635   0.936402770   0.752335272
O        0.048248475   0.926869946   0.258495597
O        0.063601726   0.936404576   0.752340848
O        0.728561184   0.457125492   0.415289136
O        0.728581152   0.457165685   0.915753414
O        0.542266886   0.271154086   0.415496080
O        0.542805564   0.271148458   0.915890570
O        0.728884148   0.271154197   0.415496768
O        0.728339273   0.271148942   0.915891395
O        0.395864857   0.791732600   0.083519515
O        0.395289328   0.790582664   0.581374326
O        0.209561319   0.605365925   0.082400037
O        0.209826522   0.605164936   0.582111090
O        0.395801292   0.605365932   0.082400626
O        0.395334566   0.605164857   0.582111276
O        0.270661114   0.137458149   0.267046263
O        0.270799121   0.135457448   0.765237269
O        0.866794494   0.137457999   0.267045846
O        0.864653819   0.135457326   0.765235304
O        0.869429613   0.738862838   0.266196300
O        0.864693834   0.729392619   0.765539213
O        0.937422239   0.468955818   0.432841161
O        0.936894775   0.468585467   0.932933875
O        0.531530090   0.468955164   0.432840695
O        0.531686341   0.468584566   0.932933489
O        0.531369246   0.062742535   0.432237281
O        0.531462730   0.062930201   0.933113287
O        0.605038373   0.802234582   0.099497415
O        0.603234269   0.801561602   0.599893300
O        0.197193326   0.802234369   0.099497744
O        0.198323134   0.801561932   0.599893758
O        0.198569999   0.397144296   0.099516414
O        0.198805619   0.397615117   0.600245754
O        0.093347657   0.186700281   0.042027458
O        0.093440728   0.186884776   0.544199175
O        0.817923279   0.908738401   0.043384810
O        0.813105348   0.906132684   0.540799635
O        0.090811895   0.908736777   0.043388206
O        0.093023696   0.906132579   0.540799840
O        0.759851663   0.519708168   0.209847609
O        0.758494048   0.516992183   0.709143892
O        0.484098636   0.241268039   0.209559295
O        0.483533997   0.241778741   0.708848089
O        0.757166687   0.241266497   0.209559326
O        0.758241172   0.241778341   0.708847216
O        0.426835163   0.853673768   0.372897757
O        0.424939358   0.849882742   0.876748725
O        0.149530865   0.575061727   0.376241070
O        0.150095214   0.575250180   0.877083609
O        0.425527411   0.575061151   0.376240756
O        0.425150915   0.575250127   0.877083872
O        0.185397026   0.093394570   0.054271195
O        0.190892216   0.095729744   0.553245849
O        0.907992991   0.093395257   0.054268567
O        0.904834263   0.095729790   0.553245004
O        0.906266051   0.812536075   0.055248517
O        0.904474164   0.808952071   0.554822377
O        0.852141971   0.426249984   0.220311881
O        0.853131803   0.426759323   0.720249760
O        0.574102455   0.426251834   0.220311917
O        0.573623708   0.426758799   0.720249681
O        0.570926781   0.141856772   0.220521228
O        0.573350927   0.146706212   0.719686525
O        0.519181006   0.760307892   0.386691311
O        0.520598883   0.760437604   0.886893392
O        0.241122866   0.760308544   0.386691220
O        0.239835145   0.760437015   0.886893997
O        0.240333667   0.480671067   0.386532538
O        0.239821705   0.479647525   0.887195565
O        0.197612841   0.191943167   0.398641193
O        0.200156067   0.189509603   0.897326647
O        0.812441537   0.009281538   0.397679781
O        0.811191676   0.010316338   0.897346182
O        0.985187222   0.800134471   0.397499408
O        0.989574956   0.800444265   0.897625899
O        0.814943584   0.800134453   0.397499412
O        0.810864141   0.800443367   0.897625460
O        0.994327448   0.191943104   0.398640597
O        0.989349722   0.189509531   0.897324812
O        0.196837086   0.009281749   0.397680404
O        0.199119492   0.010315823   0.897348239
O        0.865534837   0.523010086   0.063950462
O        0.865221712   0.522814213   0.563776816
O        0.477366781   0.342691179   0.064271212
O        0.477484061   0.343278109   0.564052304
O        0.657518364   0.134051777   0.064361610
O        0.657451456   0.134405519   0.563579458
O        0.476528876   0.134052053   0.064361780
O        0.476948707   0.134406145   0.563579742
O        0.657469991   0.523009601   0.063950248
O        0.657587407   0.522813498   0.563776723
O        0.865320489   0.342691883   0.064271267
O        0.865790374   0.343278542   0.564052145
O        0.536191116   0.857104995   0.230513101
O        0.531162830   0.856414802   0.730621670
O        0.143683864   0.676046116   0.230733788
O        0.144042903   0.675137583   0.730803054
O        0.324791046   0.468695232   0.230571246
O        0.325345064   0.469439061   0.731031215
O        0.143899932   0.468695628   0.230571065
O        0.144089888   0.469438826   0.731031025
O        0.320911235   0.857105343   0.230513232
O        0.325246995   0.856414839   0.730622418
O        0.532358487   0.676046243   0.230733727
O        0.531089319   0.675136594   0.730802531
O        0.285345322   0.286659608   0.050130787
O        0.285457356   0.287557762   0.550446288
O        0.714588710  -0.001831153   0.049673903
O        0.713306469  -0.002039442   0.549659805
O        1.001771965   0.715694926   0.050442891
O        1.001995299   0.714683434   0.548543940
O        0.713919240   0.715694983   0.050442793
O        0.712684327   0.714683068   0.548543826
O        1.001310411   0.286660069   0.050129893
O        1.002097214   0.287557818   0.550445703
O        0.283576029  -0.001831037   0.049674907
O        0.284650279  -0.002039751   0.549660355
O        0.951170959   0.619396478   0.216583887
O        0.951407862   0.619497403   0.716172217
O        0.381034933   0.332100035   0.216892738
O        0.381057451   0.332426776   0.716794654
O        0.671455106   0.048513416   0.216388994
O        0.668101522   0.048776271   0.716447101
O        0.377055297   0.048513973   0.216389455
O        0.380670318   0.048776258   0.716447921
O        0.668222427   0.619397487   0.216583501
O        0.668084800   0.619496611   0.716171955
O        0.951061737   0.332100583   0.216892507
O        0.951365587   0.332426628   0.716794209
O        0.620230270   0.953402619   0.382851547
O        0.617888576   0.953127179   0.883370104
O        0.047763371   0.666042429   0.383501615
O        0.046934026   0.664891412   0.883290769
O        0.335089522   0.382315424   0.383156341
O        0.335571487   0.382463208   0.883492771
O        0.047222553   0.382315553   0.383156183
O        0.046887671   0.382463200   0.883492320
O        0.333168878   0.953402638   0.382851942
O        0.335233997   0.953126941   0.883370821
O        0.618275593   0.666042503   0.383501391
O        0.617952871   0.664890796   0.883290425
O        0.211233011   0.272988515   0.230808521
O        0.211914450   0.274028483   0.732012127
O        0.737366311   0.941799106   0.229897848
O        0.726530240   0.938113969   0.731805246
O        0.060882243   0.787995995   0.233548633
O        0.061665515   0.788423454   0.731419184
O        0.727110228   0.787996565   0.233548657
O        0.726751179   0.788421820   0.731419128
O        0.061752357   0.272988518   0.230808241
O        0.062110352   0.274028053   0.732011400
O        0.204429891   0.941798193   0.229899089
O        0.211578729   0.938115178   0.731805855
O        0.877009064   0.604505371   0.396879784
O        0.877004530   0.604558671   0.897600114
O        0.394830726   0.272546506   0.398546771
O        0.395772025   0.272682819   0.897681265
O        0.728801401   0.123085278   0.397875188
O        0.727670220   0.122932476   0.897838999
O        0.394280618   0.123085206   0.397875501
O        0.395257603   0.122932272   0.897839495
O        0.727492673   0.604505161   0.396879585
O        0.727549594   0.604558050   0.897599955
O        0.877712642   0.272546515   0.398546661
O        0.876906878   0.272682739   0.897681171
O        0.544418927   0.938733339   0.065289044
O        0.543723673   0.937973125   0.563966140
O        0.061865053   0.605877109   0.064494800
O        0.062197081   0.605804190   0.564607028
O        0.394758069   0.456743072   0.064448172
O        0.394422574   0.456787856   0.564694928
O        0.061981577   0.456743265   0.064447674
O        0.062361736   0.456787925   0.564694788
O        0.394310687   0.938733168   0.065289126
O        0.394245885   0.937973430   0.563967124
O        0.544008470   0.605877069   0.064494767
O        0.543603172   0.605804104   0.564606267
H       -0.012675752  -0.025346208   0.474470645
H        0.001557285   0.003188613   0.961910998
H        0.665858352   0.331728208   0.129554969
H        0.666077095   0.332160292   0.628760199
H        0.333783066   0.667570492   0.295972639
H        0.333772693   0.667553742   0.795902145
H        0.265617018   0.135074888   0.200407899
H        0.268282256   0.134094265   0.698439219
H        0.869455554   0.135074575   0.200407507
H        0.865805211   0.134097046   0.698437092
H        0.871585810   0.743175036   0.199232715
H        0.866086188   0.732176817   0.698772552
H        0.936342147   0.467953885   0.366073757
H        0.935878230   0.467864356   0.866138330
H        0.531607908   0.467952925   0.366073268
H        0.531981199   0.467863422   0.866137942
H        0.532067818   0.064140369   0.365437788
H        0.532011209   0.064027553   0.866322980
H        0.604590688   0.802083750   0.032676752
H        0.602899225   0.801669948   0.533146460
H        0.197490214   0.802083910   0.032677084
H        0.198766159   0.801671078   0.533146934
H        0.198918356   0.397840722   0.032699394
H        0.198780825   0.397565220   0.533491233
