# Supplementary material for: Effect of Fe–Fe interactions and X-site vacancy ordering on the OH-stretching spectrum of foitite
Source: Copernicus journal article supplement (doi:10.5194/ejm-35-105-2023), 2023-02-16
Supplement: Supplementary file 1 [file ejm-35-105-2023-supplement.zip › model_8.cif]

#======================================================================

# CRYSTAL DATA

#----------------------------------------------------------------------

data_VESTA_phase_1


_pd_phase_name                         
_cell_length_a 16.1067867
_cell_length_b 16.1067867
_cell_length_c 14.55806160
_cell_angle_alpha                      90
_cell_angle_beta                       90
_cell_angle_gamma                      120
_symmetry_space_group_name_H-M         'P1'
_symmetry_Int_Tables_number            1

loop_
_symmetry_equiv_pos_as_xyz
   'x, y, z'

loop_
   _atom_site_label
   _atom_site_fract_x
   _atom_site_fract_y
   _atom_site_fract_z
Na       0.666561096   0.333128805   0.304794734
Na       0.666361203   0.332733196   0.804789498
Na       0.333015282   0.666040555   0.471614025
Na       0.333623014   0.667256892   0.970894095
Fea      0.123779755   0.061640886   0.321734544
Mg       0.124340207   0.062440556   0.822066970
Feb      0.937848725   0.061641078   0.321736805
Mg       0.938087735   0.062440246   0.822067364
Al       0.934339876   0.868691494   0.325928745
Mg       0.937989928   0.875992800   0.822208249
Mg       0.793444900   0.396848321   0.489873930
Mg       0.793190909   0.396329115   0.989347564
Mg       0.603388515   0.396848522   0.489870179
Mg       0.603121502   0.396329006   0.989345095
Mg       0.603407724   0.206830583   0.490141297
Mg       0.603057891   0.206131108   0.989424487
Mg       0.460267321   0.730348637   0.155655102
Mg       0.460084390   0.730392569   0.656193051
Mg       0.270067289   0.730348415   0.155652438
Mg       0.270293616   0.730392400   0.656191126
Mg       0.270260779   0.540537323   0.156052950
Mg       0.270187375   0.540389069   0.656575064
Al       0.299669711   0.262505614   0.316232998
Al       0.297652235   0.260991462   0.816343500
Al       0.739500189   0.038158958   0.315674688
Al       0.739428506   0.036929731   0.816269898
Al       0.964332180   0.699746946   0.315957952
Al       0.963214721   0.702528252   0.816080400
Al       0.735402411   0.699747798   0.315958209
Al       0.739300013   0.702527815   0.816080624
Al       0.962823136   0.262506605   0.316233585
Al       0.963326693   0.260991127   0.816343687
Al       0.298646660   0.038157992   0.315674411
Al       0.297488494   0.036929545   0.816269868
Al       0.965490973   0.595133196   0.483377750
Al       0.964931708   0.595311015   0.982448684
Al       0.404510061   0.370131494   0.483722013
Al       0.404290472   0.369372646   0.982991861
Al       0.630323001   0.035036349   0.483120267
Al       0.630278983   0.034435346   0.982803280
Al       0.404700494   0.035035956   0.483120172
Al       0.404143017   0.034435239   0.982803479
Al       0.629629011   0.595133061   0.483376978
Al       0.630363889   0.595310751   0.982448534
Al       0.965608208   0.370131579   0.483723127
Al       0.965068004   0.369372629   0.982991338
Al       0.634026557   0.928376699   0.148705930
Al       0.632044365   0.928800216   0.650030191
Al       0.071580439   0.702093842   0.148521751
Al       0.071943954   0.703912954   0.649908245
Al       0.297195894   0.368868256   0.149147828
Al       0.296602980   0.368403218   0.650350945
Al       0.071657356   0.368868807   0.149147981
Al       0.071786981   0.368403254   0.650351459
Al       0.294338936   0.928376237   0.148705720
Al       0.296743556   0.928800057   0.650030313
Al       0.630501133   0.702095859   0.148522021
Al       0.631956240   0.703913557   0.649907895
Si       0.192392198   0.190410926   0.008780619
Si       0.192891510   0.191300351   0.508730965
Si       0.810407012   0.002096299   0.008513296
Si       0.809607273   0.002668263   0.508569347
Si       0.997645763   0.807361226   0.008743387
Si       0.997456267   0.807738830   0.509178494
Si       0.809702538   0.807361157   0.008743341
Si       0.810270663   0.807738742   0.509179339
Si       0.998006280   0.190411483   0.008780777
Si       0.998397382   0.191300681   0.508731295
Si       0.191676309   0.002095483   0.008513282
Si       0.193049255   0.002667910   0.508568606
Si       0.858646920   0.523502094   0.174277587
Si       0.859379409   0.524450661   0.674628468
Si       0.476330026   0.334586074   0.174620432
Si       0.476091840   0.335558599   0.674947751
Si       0.664264456   0.139475802   0.174600012
Si       0.664962609   0.140990120   0.674855157
Si       0.475199189   0.139477088   0.174600289
Si       0.476014069   0.140990389   0.674854904
Si       0.664835224   0.523501692   0.174279315
Si       0.665057256   0.524450530   0.674627881
Si       0.858241149   0.334585830   0.174618898
Si       0.859453615   0.335558687   0.674948963
Si       0.526733329   0.858046246   0.340611381
Si       0.525916684   0.857536881   0.841229315
Si       0.143161593   0.668802024   0.341039278
Si       0.142582690   0.668553076   0.841270697
Si       0.331834916   0.474602046   0.341253529
Si       0.331630851   0.474271952   0.841581984
Si       0.142753417   0.474602268   0.341253664
Si       0.142627450   0.474271963   0.841582261
Si       0.331301981   0.858046002   0.340610267
Si       0.331607569   0.857536321   0.841229544
Si       0.525628060   0.668802717   0.341040019
Si       0.525957455   0.668553626   0.841270127
B        0.112087886   0.224190500   0.238610748
B        0.110743654   0.221499894   0.739049960
B        0.779128368   0.885664377   0.239920239
B        0.779006248   0.889685334   0.738781471
B        0.106524248   0.885662683   0.239920292
B        0.110666532   0.889685442   0.738781370
B        0.776802060   0.553616608   0.402570426
B        0.776682955   0.553379721   0.903176998
B        0.446899875   0.223749965   0.403764557
B        0.446293629   0.223081537   0.903479945
B        0.776837852   0.223750196   0.403766773
B        0.776774902   0.223081765   0.903480983
B        0.443709804   0.887431131   0.070498686
B        0.443580383   0.887172554   0.569990043
B        0.113194054   0.556503749   0.069850396
B        0.113270092   0.556905849   0.570438411
B        0.443295659   0.556504449   0.069851375
B        0.443623183   0.556906216   0.570438900
O       -0.010578414  -0.021146509   0.400734173
O        0.000036306   0.000084371   0.900889922
O        0.666486216   0.332994495   0.063433537
O        0.666976830   0.333974099   0.563509303
O        0.333863577   0.667746145   0.229774692
O        0.333644401   0.667308006   0.729826686
O        0.064159953   0.128335119   0.253668750
O        0.063611707   0.127236475   0.754092994
O        0.874241039   0.924411962   0.259534767
O        0.873225075   0.936715064   0.753943529
O        0.050159168   0.924410748   0.259533544
O        0.063477505   0.936715011   0.753944015
O        0.728755577   0.457522241   0.415434478
O        0.728455533   0.456924364   0.915609863
O        0.543327217   0.271692490   0.415881510
O        0.542803749   0.271185685   0.915668770
O        0.728353257   0.271692751   0.415884951
O        0.728369215   0.271186194   0.915670986
O        0.395448375   0.790907226   0.082709851
O        0.395324174   0.790660203   0.581479043
O        0.209629076   0.605026617   0.081830153
O        0.209700066   0.605157333   0.582152373
O        0.395383651   0.605027277   0.081832776
O        0.395445151   0.605157983   0.582154468
O        0.274760432   0.138084089   0.265328476
O        0.270525171   0.135420433   0.765749729
O        0.863313281   0.138085450   0.265329739
O        0.864883679   0.135418881   0.765749951
O        0.869758442   0.739531667   0.264683692
O        0.864825054   0.729663988   0.765744642
O        0.937287579   0.469320009   0.433247288
O        0.937006381   0.468463784   0.933192941
O        0.532018906   0.469318336   0.433245171
O        0.531442918   0.468461708   0.933191118
O        0.531496735   0.063007248   0.433107831
O        0.531338223   0.062690608   0.933125885
O        0.603772988   0.801236857   0.099372433
O        0.603484196   0.801900269   0.599851087
O        0.197452899   0.801234666   0.099372101
O        0.198403280   0.801898451   0.599850642
O        0.198717909   0.397452772   0.099894496
O        0.198616272   0.397247576   0.600252567
O        0.094073153   0.188158927   0.042637962
O        0.093566488   0.187144489   0.541340035
O        0.812883108   0.906098257   0.042864531
O        0.812929798   0.906497283   0.539845122
O        0.093203476   0.906096572   0.042865533
O        0.093555975   0.906496881   0.539844405
O        0.759879131   0.519777546   0.209906176
O        0.758416302   0.516846696   0.709241049
O        0.483512349   0.240826311   0.209336004
O        0.483786204   0.242131233   0.709304405
O        0.757303038   0.240822658   0.209335438
O        0.758332939   0.242129595   0.709304811
O        0.425388601   0.850788336   0.373392041
O        0.424790683   0.849593593   0.876342993
O        0.150351584   0.575566681   0.376634841
O        0.150237932   0.575306720   0.876549977
O        0.425202767   0.575565907   0.376633703
O        0.425056197   0.575306410   0.876548732
O        0.190605292   0.095434725   0.054305293
O        0.191287854   0.095898997   0.552581861
O        0.904816845   0.095435749   0.054305354
O        0.904600820   0.095898545   0.552582361
O        0.903971856   0.807956512   0.054952209
O        0.904869186   0.809749772   0.554889531
O        0.850484647   0.425277045   0.220038678
O        0.853526589   0.427172487   0.720162369
O        0.574772460   0.425279944   0.220045100
O        0.573632849   0.427171603   0.720161013
O        0.571792048   0.143596431   0.220471346
O        0.573441341   0.146896320   0.720294048
O        0.520546557   0.760663328   0.386538856
O        0.520543411   0.760342707   0.886635474
O        0.240105528   0.760662136   0.386535859
O        0.239787679   0.760340924   0.886635089
O        0.240009950   0.480033702   0.386594671
O        0.239914004   0.479841507   0.886994505
O        0.201487564   0.192863618   0.397953370
O        0.200009862   0.189752292   0.898194582
O        0.808851187   0.008902177   0.397322415
O        0.810681991   0.010112973   0.897947983
O        0.984605890   0.800095720   0.397081605
O        0.989540280   0.800044502   0.898185899
O        0.815478010   0.800095161   0.397082681
O        0.810490571   0.800043968   0.898185875
O        0.991364017   0.192864354   0.397953914
O        0.989730130   0.189752440   0.898194747
O        0.200038856   0.008901553   0.397321846
O        0.199417568   0.010112596   0.897947900
O        0.865200684   0.522507914   0.063890662
O        0.865355149   0.523473531   0.563842978
O        0.477310996   0.342414344   0.064139896
O        0.477651579   0.343321615   0.564283779
O        0.657155205   0.134031040   0.064107596
O        0.657545123   0.134835199   0.564164684
O        0.476859349   0.134032359   0.064107620
O        0.477273729   0.134836314   0.564164246
O        0.657282780   0.522504179   0.063892735
O        0.658101974   0.523472626   0.563842732
O        0.865087703   0.342414404   0.064138331
O        0.865655868   0.343321920   0.564284819
O        0.534824602   0.856363086   0.230262831
O        0.531348869   0.856447279   0.730536784
O        0.143605971   0.674481579   0.230393767
O        0.143985366   0.675461092   0.730608139
O        0.325073159   0.469069352   0.230626159
O        0.325029984   0.469076391   0.730906604
O        0.143980139   0.469070232   0.230626159
O        0.144031475   0.469076979   0.730906790
O        0.321529575   0.856363517   0.230261586
O        0.325084272   0.856446502   0.730537259
O        0.530863293   0.674484843   0.230394530
O        0.531462010   0.675462292   0.730607490
O        0.285272970   0.287010692   0.050328467
O        0.285410513   0.287514556   0.550508273
O        0.713404968  -0.002197533   0.049619043
O        0.713088817  -0.001747637   0.549827700
O        1.001714072   0.714680424   0.050283904
O        1.002162146   0.715359370   0.548324659
O        0.712953452   0.714680179   0.050284075
O        0.713185341   0.715358883   0.548325235
O        1.001724449   0.287010888   0.050328324
O        1.002092186   0.287514710   0.550508558
O        0.284384495  -0.002198459   0.049619060
O        0.285151186  -0.001748837   0.549827143
O        0.950982380   0.618439115   0.216798787
O        0.951486100   0.619957688   0.716203001
O        0.381809877   0.332970517   0.216930250
O        0.380868288   0.332252844   0.717052474
O        0.669026642   0.047725599   0.216211916
O        0.668283971   0.048961344   0.716770433
O        0.378687194   0.047725987   0.216211824
O        0.380664832   0.048961014   0.716770648
O        0.667441232   0.618440995   0.216799171
O        0.668458277   0.619957561   0.716203123
O        0.951146956   0.332973183   0.216930263
O        0.951371573   0.332252440   0.717052818
O        0.618379284   0.953653824   0.382730259
O        0.617724810   0.953104682   0.883187508
O        0.047459306   0.665671236   0.383276273
O        0.046823452   0.664630104   0.883127508
O        0.336380489   0.383249084   0.383287741
O        0.335539994   0.382491948   0.883473406
O        0.046855019   0.383249273   0.383287923
O        0.046938688   0.382491481   0.883473612
O        0.335263189   0.953653107   0.382729923
O        0.335367259   0.953104152   0.883187733
O        0.618199815   0.665671974   0.383276574
O        0.617793281   0.664629884   0.883126840
O        0.211902445   0.273789122   0.231776875
O        0.211549090   0.273433395   0.732173996
O        0.734271554   0.940355160   0.230110893
O        0.727044373   0.938477725   0.731805611
O        0.062018432   0.786210898   0.233317887
O        0.061624923   0.788863796   0.731506612
O        0.724182354   0.786212760   0.233317754
O        0.727225894   0.788863597   0.731506704
O        0.061872963   0.273790261   0.231777141
O        0.061872551   0.273434128   0.732174400
O        0.206072240   0.940352303   0.230112066
O        0.211420747   0.938478248   0.731805059
O        0.877080905   0.604785793   0.396588552
O        0.876841865   0.604198312   0.897370232
O        0.396490911   0.273459998   0.398178532
O        0.395714392   0.272633856   0.897735764
O        0.727759293   0.123514155   0.397828255
O        0.727526026   0.122964901   0.897768462
O        0.395742619   0.123513814   0.397826965
O        0.395425660   0.122964656   0.897767891
O        0.727691239   0.604784555   0.396587914
O        0.727341979   0.604197606   0.897371592
O        0.876956717   0.273460286   0.398180141
O        0.876906491   0.272633537   0.897735805
O        0.543863851   0.938050682   0.064933757
O        0.543735107   0.938186104   0.564446318
O        0.061815662   0.605306322   0.064362250
O        0.062187025   0.606114931   0.564662652
O        0.394421623   0.456492183   0.064574207
O        0.394748498   0.456874971   0.565047591
O        0.062055936   0.456491688   0.064573553
O        0.062113289   0.456874621   0.565047877
O        0.394174927   0.938050472   0.064933488
O        0.394439492   0.938186401   0.564447215
O        0.543476472   0.605308143   0.064361524
O        0.543915307   0.606115393   0.564662052
H       -0.009306000  -0.018603223   0.467104340
H        0.000263816   0.000540010   0.967117872
H        0.665825468   0.331679365   0.129273847
H        0.667085162   0.334202692   0.629365758
H        0.333680489   0.667389851   0.295630265
H        0.333779614   0.667585309   0.795676981
H        0.268375187   0.134530899   0.198710037
H        0.266481413   0.133452365   0.699018933
H        0.866144971   0.134532212   0.198711290
H        0.866959223   0.133451348   0.699019125
H        0.872781206   0.745577664   0.197704044
H        0.867017034   0.734047877   0.699049381
H        0.936546051   0.468358626   0.366497778
H        0.936345394   0.467901061   0.866420539
H        0.531799478   0.468356098   0.366495552
H        0.531539098   0.467899043   0.866418724
H        0.532150580   0.064315789   0.366329065
H        0.531728511   0.063472149   0.866355650
H        0.605155652   0.801877390   0.032599751
H        0.603677907   0.802209179   0.533104932
H        0.196709842   0.801875892   0.032599449
H        0.198517418   0.802208108   0.533104530
H        0.198119874   0.396257430   0.033121780
H        0.198183780   0.396383186   0.533510901
