# Supplementary material for: Effect of Fe–Fe interactions and X-site vacancy ordering on the OH-stretching spectrum of foitite
Source: Copernicus journal article supplement (doi:10.5194/ejm-35-105-2023), 2023-02-16
Supplement: Supplementary file 1 [file ejm-35-105-2023-supplement.zip › model_9.cif]

#======================================================================

# CRYSTAL DATA

#----------------------------------------------------------------------

data_VESTA_phase_1


_pd_phase_name                         
_cell_length_a 16.1067867
_cell_length_b 16.1067867
_cell_length_c 14.55806160
_cell_angle_alpha                      90
_cell_angle_beta                       90
_cell_angle_gamma                      120
_symmetry_space_group_name_H-M         'P1'
_symmetry_Int_Tables_number            1

loop_
_symmetry_equiv_pos_as_xyz
   'x, y, z'

loop_
   _atom_site_label
   _atom_site_fract_x
   _atom_site_fract_y
   _atom_site_fract_z
Na       0.000429665   0.000874652   0.137386756
Na       0.666583116   0.333169160   0.305072999
Na       0.666375751   0.332761941   0.804671953
Na       0.333015578   0.666040208   0.471913890
Na       0.333515721   0.667041534   0.971118382
Fea      0.125628842   0.062610339   0.326814148
Mg       0.124937101   0.062728481   0.818992244
Feb      0.936970875   0.062611543   0.326815483
Mg       0.937777539   0.062728799   0.818992426
Al       0.933706024   0.867424999   0.327786666
Mg       0.937668810   0.875351075   0.819153680
Mg       0.793400818   0.396943841   0.489964484
Mg       0.793068417   0.396273187   0.989409064
Mg       0.603529127   0.396943972   0.489960992
Mg       0.603187752   0.396273057   0.989406157
Mg       0.603500412   0.207014749   0.490314672
Mg       0.603158241   0.206332021   0.989420139
Mg       0.460178712   0.730273411   0.155994695
Mg       0.459855591   0.730239530   0.656482869
Mg       0.270080505   0.730273748   0.155991931
Mg       0.270370299   0.730239388   0.656480999
Mg       0.270122360   0.540260746   0.156370559
Mg       0.270295239   0.540603640   0.656830900
Al       0.300155374   0.263057525   0.316945192
Al       0.298118207   0.261499194   0.815973204
Al       0.738711491   0.038205848   0.316377005
Al       0.738897735   0.036849411   0.815892985
Al       0.964595070   0.699472641   0.316449660
Al       0.963287362   0.702054725   0.815686980
Al       0.734865455   0.699474734   0.316450684
Al       0.738754475   0.702054351   0.815687235
Al       0.962889195   0.263058509   0.316945517
Al       0.963368836   0.261499709   0.815973431
Al       0.299482900   0.038205632   0.316376815
Al       0.297938541   0.036849132   0.815892846
Al       0.965517049   0.594982640   0.483601714
Al       0.964831001   0.594808366   0.982084953
Al       0.404865212   0.370438235   0.484041368
Al       0.404706646   0.369672931   0.982668197
Al       0.629969530   0.035056455   0.483507473
Al       0.629965184   0.034618606   0.982373665
Al       0.405074920   0.035056312   0.483507475
Al       0.404640027   0.034618734   0.982373813
Al       0.629453122   0.594982440   0.483601161
Al       0.629962124   0.594808534   0.982084226
Al       0.965560840   0.370438027   0.484042660
Al       0.964951609   0.369673140   0.982668359
Al       0.633837809   0.928544266   0.148595614
Al       0.631430312   0.928502216   0.650170224
Al       0.071592890   0.702043158   0.148505025
Al       0.072217261   0.703697851   0.649915193
Al       0.296998506   0.368465386   0.149217198
Al       0.296937908   0.369015327   0.650459969
Al       0.071450963   0.368466308   0.149217625
Al       0.072065341   0.369015550   0.650460424
Al       0.294694917   0.928544637   0.148595124
Al       0.297060008   0.928502097   0.650170369
Al       0.630438061   0.702045938   0.148505824
Al       0.631468286   0.703698254   0.649915072
Si       0.192509105   0.190488752   0.007839312
Si       0.192963462   0.191682930   0.509565181
Si       0.810219096   0.002014282   0.007580965
Si       0.809134478   0.002446263   0.509298819
Si       0.997619955   0.807118787   0.007790930
Si       0.997769432   0.807858752   0.509520342
Si       0.809486520   0.807119050   0.007791219
Si       0.810077232   0.807859518   0.509521764
Si       0.997965361   0.190489452   0.007839497
Si       0.998709510   0.191683550   0.509565064
Si       0.191782013   0.002014006   0.007580707
Si       0.193300419   0.002445351   0.509297714
Si       0.858780506   0.523605433   0.174299085
Si       0.859295922   0.524358827   0.674651854
Si       0.476235788   0.334727931   0.174652270
Si       0.476273122   0.335644361   0.675033966
Si       0.664326843   0.139609507   0.174526854
Si       0.664914211   0.141115470   0.675008588
Si       0.475271211   0.139613389   0.174527034
Si       0.476188466   0.141115729   0.675008609
Si       0.664801885   0.523608013   0.174299474
Si       0.665049381   0.524358734   0.674651444
Si       0.858473053   0.334725922   0.174652241
Si       0.859358740   0.335644508   0.675034976
Si       0.526760372   0.858068629   0.340708868
Si       0.525782273   0.857412646   0.841485677
Si       0.143253451   0.668891297   0.341138564
Si       0.142635784   0.668484186   0.841459933
Si       0.331660778   0.474448541   0.341426497
Si       0.331652331   0.474361737   0.841819094
Si       0.142774138   0.474449302   0.341426889
Si       0.142696126   0.474361570   0.841819498
Si       0.331297712   0.858068931   0.340707798
Si       0.331618071   0.857412165   0.841485678
Si       0.525625140   0.668891264   0.341139235
Si       0.525835824   0.668484835   0.841459583
B        0.111204689   0.222424524   0.237674058
B        0.111070930   0.222154259   0.738499236
B        0.779762499   0.886279481   0.239154262
B        0.778415539   0.889391441   0.738182851
B        0.106504223   0.886277526   0.239152701
B        0.110963157   0.889391672   0.738182489
B        0.776969000   0.553949888   0.402820580
B        0.776713600   0.553440604   0.903233900
B        0.446917202   0.223781831   0.404122853
B        0.446226713   0.223052835   0.903528395
B        0.776852975   0.223781487   0.404124938
B        0.776813024   0.223053375   0.903529523
B        0.443767220   0.887546281   0.070570678
B        0.443452779   0.886916857   0.570050872
B        0.113021459   0.556291811   0.070015118
B        0.113437241   0.557045424   0.570461351
B        0.443256498   0.556292431   0.070016221
B        0.443596424   0.557045564   0.570461936
O       -0.010448141  -0.020885666   0.400802762
O        0.000015839   0.000049277   0.896456626
O        0.666499391   0.333021555   0.063563809
O        0.667053991   0.334126535   0.563520952
O        0.333746536   0.667512991   0.230119229
O        0.333615264   0.667248183   0.730182197
O        0.062338659   0.124689339   0.250738843
O        0.063848087   0.127709807   0.752602209
O        0.876986420   0.926024326   0.256194585
O        0.872823359   0.936523664   0.752380185
O        0.049025784   0.926022704   0.256193650
O        0.063687182   0.936523510   0.752379983
O        0.728944073   0.457899184   0.415398266
O        0.728520383   0.457053680   0.915728635
O        0.543296540   0.271759842   0.415915564
O        0.542665042   0.271136586   0.915767640
O        0.728452461   0.271760055   0.415919119
O        0.728458760   0.271137369   0.915770280
O        0.395556004   0.791122676   0.083182918
O        0.395239242   0.790489678   0.581594118
O        0.209372537   0.604770636   0.082373389
O        0.209786712   0.605216697   0.582219119
O        0.395384370   0.604771269   0.082376159
O        0.395418736   0.605217189   0.582221078
O        0.274532002   0.137926308   0.267047663
O        0.270717644   0.135497418   0.765469239
O        0.863383769   0.137927525   0.267048067
O        0.864768222   0.135496426   0.765469420
O        0.869753714   0.739524348   0.265705865
O        0.864730205   0.729473525   0.765490316
O        0.937367958   0.469417725   0.433198507
O        0.936914912   0.468380849   0.932911633
O        0.532037417   0.469416299   0.433196362
O        0.531451400   0.468378787   0.932909408
O        0.531464604   0.062942076   0.433207649
O        0.531396203   0.062806921   0.932806579
O        0.604304614   0.801576943   0.099194042
O        0.603291855   0.801810016   0.599994033
O        0.197261513   0.801575071   0.099193464
O        0.198505490   0.801808478   0.599993530
O        0.198152260   0.396321300   0.099726276
O        0.198785420   0.397584698   0.600396073
O        0.091964550   0.183943853   0.043101181
O        0.093482097   0.186974485   0.542330552
O        0.817226370   0.908200030   0.043309888
O        0.813151688   0.906688123   0.540376969
O        0.090962476   0.908197983   0.043309846
O        0.093524569   0.906687019   0.540374070
O        0.759759802   0.519544283   0.209849453
O        0.758600454   0.517214533   0.709371895
O        0.483533808   0.240975051   0.209282588
O        0.483484162   0.242007572   0.709490329
O        0.757429717   0.240965889   0.209282922
O        0.758511844   0.242006046   0.709490295
O        0.425596657   0.851204406   0.373177062
O        0.424900092   0.849812205   0.876929054
O        0.150085395   0.575383658   0.376247271
O        0.149972523   0.575159589   0.877086755
O        0.425285564   0.575382120   0.376245762
O        0.425174452   0.575159788   0.877085742
O        0.185822351   0.092996982   0.054609772
O        0.191575057   0.096033908   0.552228857
O        0.907159926   0.092998711   0.054610060
O        0.904450022   0.096033830   0.552229120
O        0.906002892   0.812017953   0.055148756
O        0.904907863   0.809827410   0.554363118
O        0.851660142   0.425886652   0.220213174
O        0.853270679   0.427099145   0.720354109
O        0.574194256   0.425901311   0.220218009
O        0.573815545   0.427098671   0.720353082
O        0.571677419   0.143367729   0.220388346
O        0.573633067   0.147279032   0.720636788
O        0.520365150   0.760621534   0.386634681
O        0.520570040   0.760314819   0.887025658
O        0.240245373   0.760621069   0.386631684
O        0.239733351   0.760313134   0.887024914
O        0.240064946   0.480143774   0.386914171
O        0.239910845   0.479834697   0.887375862
O        0.200642125   0.193421692   0.398311005
O        0.199716226   0.189294239   0.897693564
O        0.807971585   0.007618876   0.397657506
O        0.811074091   0.010204886   0.897449891
O        0.985814964   0.801556175   0.396874792
O        0.989522628   0.800332163   0.897647023
O        0.815727404   0.801559084   0.396876057
O        0.810796310   0.800331449   0.897647411
O        0.992770218   0.193423687   0.398310913
O        0.989565254   0.189295218   0.897693663
O        0.199635424   0.007617156   0.397656510
O        0.199116393   0.010204434   0.897449433
O        0.865416089   0.522727816   0.063905954
O        0.865384077   0.523489270   0.563873594
O        0.477137918   0.342482701   0.064169626
O        0.477825935   0.343460486   0.564374243
O        0.657214871   0.133916208   0.064038131
O        0.657400490   0.134867791   0.564327188
O        0.476684575   0.133918419   0.064038092
O        0.477452430   0.134868717   0.564327056
O        0.657288018   0.522725191   0.063906441
O        0.658089769   0.523488397   0.563873505
O        0.865328858   0.342484296   0.064169754
O        0.865621653   0.343460775   0.564375147
O        0.535365678   0.856527559   0.230355791
O        0.531043419   0.856297565   0.730807577
O        0.143497916   0.675005820   0.230489703
O        0.144016947   0.675233811   0.730812327
O        0.324086034   0.467908443   0.230827306
O        0.325233189   0.469356712   0.731159989
O        0.143804992   0.467910162   0.230827434
O        0.144110039   0.469357100   0.731160339
O        0.321152480   0.856529067   0.230354741
O        0.325241210   0.856297042   0.730807675
O        0.531494153   0.675008194   0.230490375
O        0.531204039   0.675234992   0.730811989
O        0.284676996   0.286102781   0.050388903
O        0.285573960   0.287740507   0.550738212
O        0.714141654  -0.002057279   0.049649749
O        0.712823687  -0.001756236   0.550124786
O        1.001700672   0.715296680   0.050356002
O        1.002259050   0.715415001   0.548193597
O        0.713583418   0.715297219   0.050356217
O        0.713144347   0.715414661   0.548194508
O        1.001410740   0.286102979   0.050389513
O        1.002156069   0.287740835   0.550738372
O        0.283788113  -0.002057406   0.049649335
O        0.285408080  -0.001757734   0.550124193
O        0.950981321   0.619136881   0.216605264
O        0.951568888   0.619842623   0.716130905
O        0.381093446   0.332261721   0.216818207
O        0.381093679   0.332543356   0.717096447
O        0.669489099   0.047892594   0.216059976
O        0.667981714   0.048885851   0.716846290
O        0.378391879   0.047895567   0.216059628
O        0.380891844   0.048885688   0.716846536
O        0.668142520   0.619143677   0.216604390
O        0.668260993   0.619842543   0.716131190
O        0.951153393   0.332267923   0.216820222
O        0.951437513   0.332543401   0.717096732
O        0.618510657   0.953736908   0.382735336
O        0.617860434   0.953016711   0.883378416
O        0.047580655   0.665998490   0.383273785
O        0.046853473   0.664789095   0.883279653
O        0.336157424   0.382978754   0.383348530
O        0.335275591   0.382302176   0.883694175
O        0.046808318   0.382979020   0.383348936
O        0.047013490   0.382301888   0.883694771
O        0.335215773   0.953737047   0.382734737
O        0.335143475   0.953016023   0.883378427
O        0.618405194   0.665998128   0.383274167
O        0.617922681   0.664789072   0.883279082
O        0.210643398   0.271550924   0.231386310
O        0.211845465   0.273925593   0.732205830
O        0.735688468   0.941201176   0.229646492
O        0.726578067   0.938284158   0.731826488
O        0.061745743   0.787202219   0.233286674
O        0.061803641   0.788608520   0.731464156
O        0.725444890   0.787204867   0.233289094
O        0.726792153   0.788608208   0.731464421
O        0.060890944   0.271550159   0.231385451
O        0.062069044   0.273926783   0.732206456
O        0.205500188   0.941199525   0.229645785
O        0.211693378   0.938284754   0.731825738
O        0.877321201   0.605328041   0.396940097
O        0.876939639   0.604416809   0.897511470
O        0.396237820   0.273295261   0.398650198
O        0.395469384   0.272485642   0.897888642
O        0.727768685   0.123484044   0.398288037
O        0.727657699   0.122867478   0.897892109
O        0.395703588   0.123484206   0.398287464
O        0.395196061   0.122866877   0.897891615
O        0.727995423   0.605328570   0.396940398
O        0.727463329   0.604416239   0.897512389
O        0.877045663   0.273294558   0.398652173
O        0.877003212   0.272486025   0.897888839
O        0.544057207   0.938220448   0.064872471
O        0.543601075   0.938004653   0.564455788
O        0.061675700   0.605273790   0.064374172
O        0.062330184   0.606243071   0.564577055
O        0.394231545   0.456143898   0.064657021
O        0.394801975   0.457011307   0.565035107
O        0.061897751   0.456143548   0.064656382
O        0.062197254   0.457011162   0.565035441
O        0.394151206   0.938220537   0.064872361
O        0.394392399   0.938004781   0.564456418
O        0.543584108   0.605275654   0.064373514
O        0.543901034   0.606243209   0.564576903
H       -0.009678794  -0.019348049   0.467286881
H        0.000385211   0.000781666   0.962239992
H        0.665783302   0.331592759   0.129406448
H        0.667152768   0.334335624   0.629381246
H        0.333647584   0.667322955   0.295983059
H        0.333706336   0.667436994   0.796025109
H        0.269757391   0.135278904   0.200392897
H        0.268254618   0.134306277   0.698673471
H        0.865510844   0.135280232   0.200393265
H        0.866039953   0.134305700   0.698673639
H        0.871791220   0.743600490   0.198714479
H        0.866104254   0.732221679   0.698723841
H        0.936477627   0.468353831   0.366442574
H        0.935937201   0.467655592   0.866115440
H        0.531864320   0.468351587   0.366440195
H        0.531702279   0.467653415   0.866113214
H        0.532103039   0.064219672   0.366429666
H        0.531953504   0.063922141   0.866011794
H        0.603633161   0.801195883   0.032368873
H        0.602927008   0.801849206   0.533245177
H        0.197551493   0.801194883   0.032368276
H        0.198908807   0.801848398   0.533244713
H        0.198568339   0.397154170   0.032913681
H        0.198613449   0.397241379   0.533644645
