# Supplementary material for: Effect of Fe–Fe interactions and X-site vacancy ordering on the OH-stretching spectrum of foitite
Source: Copernicus journal article supplement (doi:10.5194/ejm-35-105-2023), 2023-02-16
Supplement: Supplementary file 1 [file ejm-35-105-2023-supplement.zip › model_10.cif]

#======================================================================

# CRYSTAL DATA

#----------------------------------------------------------------------

data_VESTA_phase_1


_pd_phase_name                         
_cell_length_a 16.1067867
_cell_length_b 16.1067867
_cell_length_c 14.55806160
_cell_angle_alpha                      90
_cell_angle_beta                       90
_cell_angle_gamma                      120
_symmetry_space_group_name_H-M         'P1'
_symmetry_Int_Tables_number            1

loop_
_symmetry_equiv_pos_as_xyz
   'x, y, z'

loop_
   _atom_site_label
   _atom_site_fract_x
   _atom_site_fract_y
   _atom_site_fract_z
Na       0.666865696   0.333453984   0.304562134
Na       0.665806535   0.332931882   0.804781952
Na       0.333049607   0.666505354   0.471968480
Na       0.333279082   0.666619284   0.971073054
Fe       0.125791896   0.062900659   0.321625133
Mg       0.124254953   0.062132600   0.821947097
Al       0.934601894   0.063042362   0.326853620
Mg       0.938042453   0.062165433   0.821936382
Al       0.934599815   0.871566554   0.326857554
Mg       0.938041546   0.875885288   0.821934971
Mg       0.794126099   0.397062271   0.488771968
Mg       0.792834842   0.396421150   0.989677571
Mg       0.603968253   0.397186943   0.489563611
Mg       0.602789322   0.396405988   0.989519775
Mg       0.603968442   0.206777665   0.489534295
Mg       0.602790310   0.206393553   0.989507257
Mg       0.460214694   0.730117813   0.155537857
Mg       0.459867819   0.729940704   0.656463178
Mg       0.269766964   0.730100257   0.155891618
Mg       0.270234455   0.730051979   0.656506691
Mg       0.269769615   0.539694058   0.155926422
Mg       0.270235478   0.540197999   0.656529554
Al       0.299189347   0.261382120   0.316498344
Al       0.297523871   0.260726673   0.816467766
Al       0.737037494   0.035301964   0.315784825
Al       0.739240573   0.036832079   0.816184015
Al       0.965139480   0.701856516   0.316385936
Al       0.963106455   0.702310492   0.816186982
Al       0.737033748   0.701741031   0.315793977
Al       0.739238619   0.702416448   0.816188223
Al       0.965143361   0.263293537   0.316384156
Al       0.963108449   0.260806085   0.816190029
Al       0.299188654   0.037818856   0.316493503
Al       0.297524248   0.036809052   0.816460932
Al       0.966117645   0.595822882   0.483087262
Al       0.964650450   0.595264947   0.982631744
Al       0.404941667   0.370342305   0.483460982
Al       0.403928291   0.369371665   0.982985861
Al       0.629827898   0.034404983   0.482880202
Al       0.629997719   0.034868112   0.982339683
Al       0.404941146   0.034605422   0.483452827
Al       0.403928864   0.034568816   0.982978375
Al       0.629825066   0.595424256   0.482889981
Al       0.629995043   0.595139669   0.982345164
Al       0.966119812   0.370300259   0.483087287
Al       0.964650672   0.369395580   0.982634105
Al       0.632442178   0.928484150   0.147594926
Al       0.631755864   0.928246754   0.650112029
Al       0.071245553   0.702649786   0.148422683
Al       0.072097397   0.703808613   0.650255703
Al       0.294379639   0.365823750   0.148739333
Al       0.297030759   0.368455392   0.650632509
Al       0.071250716   0.368611658   0.148424947
Al       0.072099950   0.368297514   0.650257913
Al       0.294379966   0.928572103   0.148731857
Al       0.297030427   0.928585039   0.650625073
Al       0.632440481   0.703967373   0.147601549
Al       0.631753454   0.703514448   0.650118116
Si       0.191403538   0.189551772   0.008612657
Si       0.193768665   0.191034028   0.509236607
Si       0.810004483   0.002098083   0.008515273
Si       0.810428664   0.002646928   0.509718126
Si       0.997527409   0.807430805   0.008744703
Si       0.997772524   0.808665490   0.510382788
Si       0.810002744   0.807915739   0.008516746
Si       0.810426899   0.807786884   0.509723864
Si       0.997529137   0.190108805   0.008747840
Si       0.997773968   0.189115517   0.510380146
Si       0.191402773   0.001863790   0.008608532
Si       0.193767875   0.002743296   0.509234383
Si       0.858433948   0.523780325   0.174790040
Si       0.859681262   0.524438623   0.673682100
Si       0.475243331   0.335046001   0.174890237
Si       0.476260720   0.335472839   0.674537638
Si       0.664454446   0.140237830   0.174642979
Si       0.665240949   0.140775364   0.673992609
Si       0.475243555   0.140208550   0.174884058
Si       0.476260605   0.140792570   0.674526889
Si       0.664452746   0.524225067   0.174649279
Si       0.665239059   0.524467473   0.674007027
Si       0.858436138   0.334664936   0.174790814
Si       0.859684009   0.335249870   0.673680093
Si       0.526461206   0.857431774   0.340460235
Si       0.525761782   0.857421687   0.841275577
Si       0.142882975   0.668613498   0.341100758
Si       0.142424040   0.668333377   0.841435588
Si       0.331525916   0.473711443   0.340813063
Si       0.331506645   0.474176335   0.841570588
Si       0.142885841   0.474281888   0.341108981
Si       0.142424701   0.474102407   0.841441301
Si       0.331526168   0.857826461   0.340799531
Si       0.331506308   0.857342532   0.841560442
Si       0.526459030   0.669035929   0.340465632
Si       0.525760421   0.668350992   0.841280400
B        0.106647329   0.219510509   0.240826786
B        0.110782344   0.221243020   0.738953528
B        0.780860938   0.890434158   0.240791777
B        0.778976140   0.889491844   0.738648355
B        0.106644791   0.887146645   0.240826398
B        0.110781470   0.889548445   0.738949970
B        0.777704810   0.554997131   0.402337011
B        0.776537930   0.553377498   0.903380213
B        0.447170653   0.223589927   0.403731121
B        0.445991472   0.223001655   0.903740305
B        0.777707684   0.222714564   0.402324283
B        0.776538210   0.223172374   0.903373460
B        0.443215412   0.887343792   0.070661957
B        0.443706958   0.886811026   0.569958406
B        0.112701947   0.556356399   0.070312875
B        0.113251742   0.556628659   0.569992582
B        0.443213755   0.555882384   0.070678797
B        0.443706411   0.556900984   0.569971993
O       -0.016292374  -0.008141664   0.397627566
O       -0.000121447  -0.000056570   0.900791297
O        0.666136195   0.333070431   0.063790619
O        0.668043487   0.334010119   0.562092065
O        0.333673648   0.666865627   0.230223813
O        0.333459833   0.666746096   0.729764599
O        0.050852739   0.123514586   0.262305926
O        0.063530725   0.126971908   0.753822356
O        0.877519295   0.938762619   0.264500621
O        0.873203221   0.936605667   0.753660753
O        0.050849704   0.927346594   0.262308139
O        0.063530467   0.936567970   0.753822052
O        0.729756693   0.458864146   0.414817462
O        0.728214385   0.456939937   0.915855399
O        0.543641676   0.271826159   0.415492279
O        0.542488966   0.271251295   0.915888492
O        0.729761107   0.270901390   0.414797038
O        0.728214788   0.271287197   0.915842477
O        0.395339309   0.790873250   0.083157968
O        0.395430769   0.790415659   0.581592736
O        0.209126648   0.604566846   0.082516931
O        0.209552508   0.604777923   0.581904542
O        0.395336283   0.604474569   0.083188013
O        0.395429173   0.605018674   0.581611757
O        0.273919913   0.136965522   0.265847102
O        0.270568389   0.135290613   0.766067069
O        0.871920370   0.127166035   0.264657995
O        0.864706808   0.135265167   0.766005912
O        0.871916947   0.744759121   0.264664162
O        0.864702655   0.729446878   0.766005841
O        0.937783567   0.468894415   0.431701035
O        0.936717233   0.468363890   0.933533309
O        0.532349320   0.469670548   0.432255571
O        0.531202300   0.468382447   0.933392473
O        0.532348803   0.062680739   0.432242466
O        0.531202542   0.062830112   0.933385691
O        0.604365351   0.802187091   0.099012884
O        0.603616477   0.801811251   0.599903229
O        0.197194680   0.801482029   0.099782374
O        0.198419936   0.801752997   0.600129026
O        0.197197054   0.395729523   0.099791452
O        0.198422957   0.396678758   0.600138068
O        0.092936225   0.186918891   0.043443908
O        0.093306922   0.185464740   0.540502356
O        0.813387785   0.906699255   0.043647490
O        0.812816667   0.906412068   0.540062384
O        0.092936527   0.906027354   0.043439034
O        0.093306064   0.907851003   0.540501226
O        0.758009309   0.517233259   0.210347797
O        0.758602625   0.516617019   0.708041405
O        0.483876740   0.241943153   0.209706133
O        0.484070897   0.242036422   0.708593315
O        0.758011427   0.240784803   0.210343383
O        0.758601201   0.241991395   0.708028011
O        0.427264370   0.853783156   0.373764307
O        0.424810011   0.849588695   0.876704491
O        0.145830634   0.572921800   0.376271697
O        0.149938417   0.574975598   0.876705215
O        0.427267260   0.573488340   0.373779642
O        0.424811510   0.575232282   0.876716876
O        0.189742055   0.094876318   0.054575331
O        0.192281380   0.096144667   0.553208033
O        0.904010482   0.095659262   0.055361141
O        0.904808389   0.094668257   0.555551806
O        0.904009897   0.808361399   0.055360385
O        0.904808342   0.810147854   0.555556704
O        0.853168481   0.426589460   0.220623668
O        0.853929466   0.426967127   0.718447049
O        0.572105993   0.427677574   0.220682046
O        0.573821808   0.427207612   0.719463047
O        0.572106315   0.144437678   0.220673317
O        0.573821988   0.146615550   0.719445315
O        0.517446577   0.758728488   0.386132352
O        0.520653843   0.760333546   0.886597764
O        0.241915451   0.758516315   0.386194446
O        0.239641915   0.760086849   0.886829432
O        0.241912471   0.483405170   0.386211895
O        0.239641760   0.479567549   0.886840435
O        0.200194904   0.191444683   0.397949741
O        0.199222915   0.189387196   0.898119319
O        0.817212140   0.013222168   0.396840471
O        0.810580722   0.010063881   0.898083827
O        0.985010926   0.804142499   0.397927011
O        0.989360554   0.800010741   0.898287354
O        0.817209541   0.803995690   0.396845937
O        0.810578786   0.800526549   0.898085185
O        0.985014688   0.180877813   0.397924063
O        0.989363244   0.189361134   0.898290287
O        0.200195369   0.008760205   0.397947759
O        0.199224810   0.009850541   0.898115606
O        0.864940532   0.522701314   0.064423678
O        0.866027634   0.523568689   0.562781339
O        0.476642872   0.342396502   0.064467125
O        0.477953950   0.343480917   0.563765405
O        0.657213324   0.134325527   0.064283540
O        0.658420721   0.134574782   0.563088676
O        0.476642266   0.134260456   0.064460588
O        0.477956622   0.134479603   0.563754528
O        0.657209497   0.522898763   0.064290388
O        0.658414371   0.523846453   0.563103880
O        0.864941036   0.342250657   0.064424160
O        0.866030454   0.342465172   0.562779270
O        0.534596970   0.856709110   0.230145590
O        0.531210302   0.856274365   0.730524406
O        0.142951320   0.675160086   0.230609097
O        0.143834656   0.675009997   0.730691670
O        0.321091335   0.464756473   0.230585850
O        0.325147085   0.469014573   0.730811025
O        0.142954407   0.467806616   0.230616955
O        0.143834048   0.468833443   0.730697621
O        0.321094144   0.856351171   0.230572305
O        0.325147233   0.856142984   0.730800493
O        0.534593664   0.677896678   0.230151065
O        0.531208040   0.674946540   0.730529430
O        0.284201890   0.286277194   0.050038330
O        0.285536751   0.287602346   0.550169691
O        0.713081112  -0.002192363   0.049782626
O        0.713332129  -0.002121207   0.547722243
O        1.001507227   0.714777314   0.050424652
O        1.002582978   0.716068061   0.548120637
O        0.713080253   0.715283134   0.049787256
O        0.713332121   0.715457427   0.547730298
O        1.001509616   0.286742404   0.050427397
O        1.002584982   0.286522593   0.548121014
O        0.284201831  -0.002063260   0.050031752
O        0.285536639  -0.002058606   0.550162941
O        0.949995758   0.619909419   0.217196243
O        0.951468528   0.619892745   0.715747800
O        0.378847032   0.330743349   0.216666089
O        0.380916530   0.331979784   0.716740767
O        0.670276301   0.048926471   0.216460033
O        0.668662879   0.048724178   0.715778812
O        0.378845921   0.048115455   0.216659431
O        0.380915209   0.048944351   0.716731738
O        0.670275185   0.621358003   0.216467433
O        0.668658191   0.619941814   0.715788371
O        0.949998939   0.330100556   0.217198431
O        0.951469596   0.331583239   0.715748910
O        0.620232382   0.951901118   0.382920595
O        0.617665798   0.953201111   0.883047932
O        0.048503184   0.668264246   0.383633164
O        0.046606854   0.664416957   0.883226504
O        0.334385166   0.381549088   0.383268744
O        0.335293959   0.382301431   0.883421799
O        0.048504581   0.380248810   0.383635004
O        0.046607777   0.382200589   0.883230582
O        0.334384738   0.952845405   0.383259981
O        0.335294617   0.953004798   0.883412987
O        0.620229774   0.668336383   0.382928036
O        0.617664159   0.664475197   0.883053340
O        0.205711119   0.264396597   0.230585120
O        0.211550990   0.273195716   0.731976789
O        0.731995592   0.940324664   0.231584054
O        0.727156037   0.938458739   0.731365250
O        0.061299460   0.788076706   0.233284752
O        0.061661836   0.788707906   0.731638481
O        0.731992682   0.791677959   0.231589645
O        0.727155255   0.788704250   0.731367565
O        0.061302509   0.273235770   0.233284409
O        0.061663528   0.272964334   0.731642169
O        0.205708414   0.941326394   0.230580725
O        0.211550051   0.938365177   0.731970878
O        0.878100086   0.606841941   0.396666007
O        0.876710511   0.604080792   0.897505576
O        0.396161653   0.272889042   0.398086971
O        0.395273204   0.272413700   0.898010490
O        0.729015015   0.122322186   0.396196875
O        0.727276576   0.123003503   0.897546392
O        0.396163181   0.123281857   0.398081581
O        0.395275111   0.122871533   0.898003598
O        0.729013817   0.606698346   0.396209486
O        0.727275479   0.604283359   0.897552950
O        0.878103273   0.271262517   0.396664220
O        0.876711640   0.272640150   0.897506176
O        0.543523701   0.938343254   0.064974127
O        0.544057132   0.937748425   0.563936846
O        0.061447064   0.605255606   0.064898108
O        0.062173638   0.605882393   0.564224305
O        0.393799410   0.455833267   0.065207364
O        0.394855158   0.456831929   0.564550029
O        0.061445206   0.456202393   0.064901963
O        0.062173215   0.456297022   0.564226582
O        0.393800566   0.937979189   0.065197595
O        0.394854925   0.938028890   0.564539546
O        0.543520962   0.605192324   0.064980538
O        0.544055935   0.606314594   0.563945738
H       -0.008751196  -0.004370451   0.463850302
H        0.000367398   0.000190956   0.967011825
H        0.664324131   0.332136449   0.129614052
H        0.669002067   0.334418989   0.627969759
H        0.333541462   0.666884829   0.296097277
H        0.333288000   0.666707675   0.795619660
H        0.268917015   0.134465668   0.199100061
H        0.266838875   0.133428681   0.699335142
H        0.874517584   0.125065750   0.197487209
H        0.866584745   0.133265191   0.699309228
H        0.874511734   0.749455921   0.197493682
H        0.866575647   0.733320227   0.699308978
H        0.936276058   0.468140231   0.364906007
H        0.936160266   0.468084118   0.866757545
H        0.532416085   0.468173738   0.365467989
H        0.531290796   0.467824887   0.866613566
H        0.532412228   0.064236609   0.365454661
H        0.531293422   0.063478302   0.866606753
H        0.605716357   0.802859794   0.032203553
H        0.603023361   0.801512901   0.533187272
H        0.196475028   0.802270389   0.032991791
H        0.198596023   0.802093566   0.533413061
H        0.196484885   0.394232450   0.033000643
H        0.198607395   0.396527303   0.533421956
